# Supplementary material for: Cobalt-catalyzed tandem one-pot synthesis of polysubstituted imidazo[1,5-a]pyridines and imidazo[1,5-a]isoquinolines
Source: Royal Society of Chemistry journal article supplement (doi:10.1039/d2ob00526c), 2022-01-01
Supplement: d2ob00526c1.pdf [file d2ob00526c1.pdf]

# Electronic Supporting Information

## Cobalt-catalyzed tandem one-pot synthesis of polysubstituted imidazo[1,5-*a*]pyridines and imidazo[1,5-*a*]isoquinolines

Neha Meena,<sup>a,†</sup> Shiv Dhiman,<sup>a,†</sup> Krishnan Rangan,<sup>b</sup> and Anil Kumar<sup>\*,a</sup>

<sup>a</sup>Department of Chemistry, Birla Institute of Technology and Science Pilani, Pilani Campus, Rajasthan, 333031, India

<sup>b</sup>Department of Chemistry, Birla Institute of Technology and Science Pilani, Hyderabad Campus, Telangana, 500078, India

E-mail: [anilkumar@pilani.bits-pilani.ac.in](mailto:anilkumar@pilani.bits-pilani.ac.in)

### 1. Copies of <sup>1</sup>H and <sup>13</sup>C{<sup>1</sup>H} NMR spectra of **3aa-fc**, **5**, **7aa-la** and **8ac**.

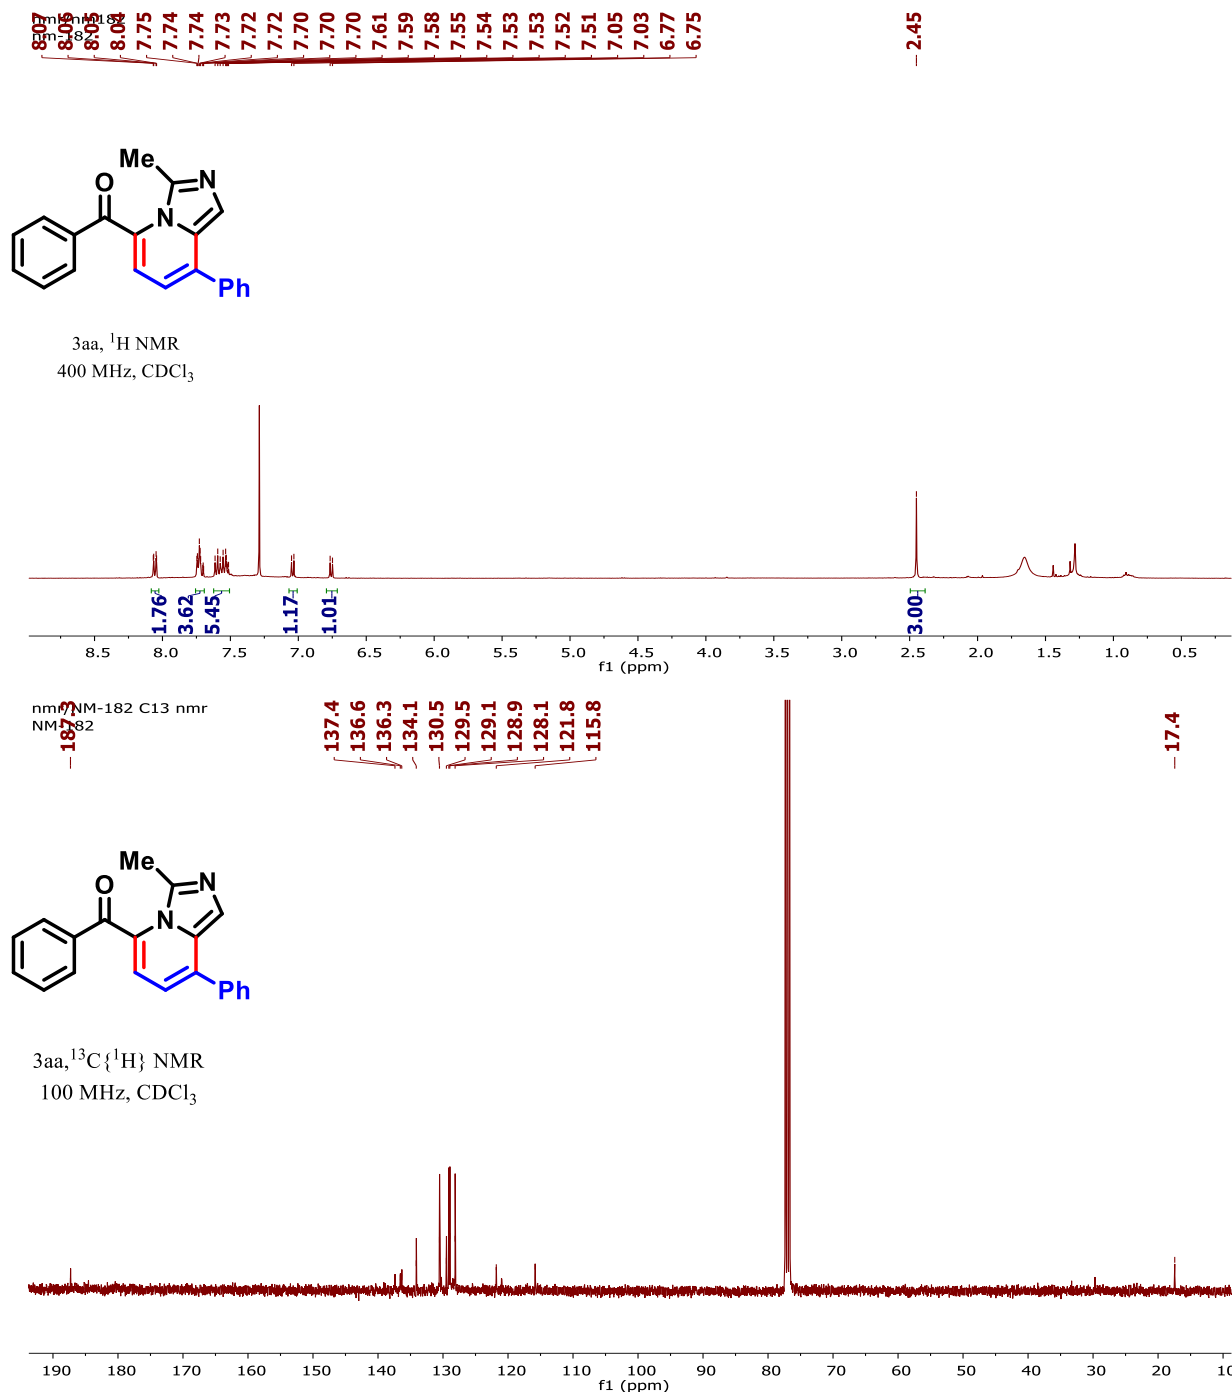

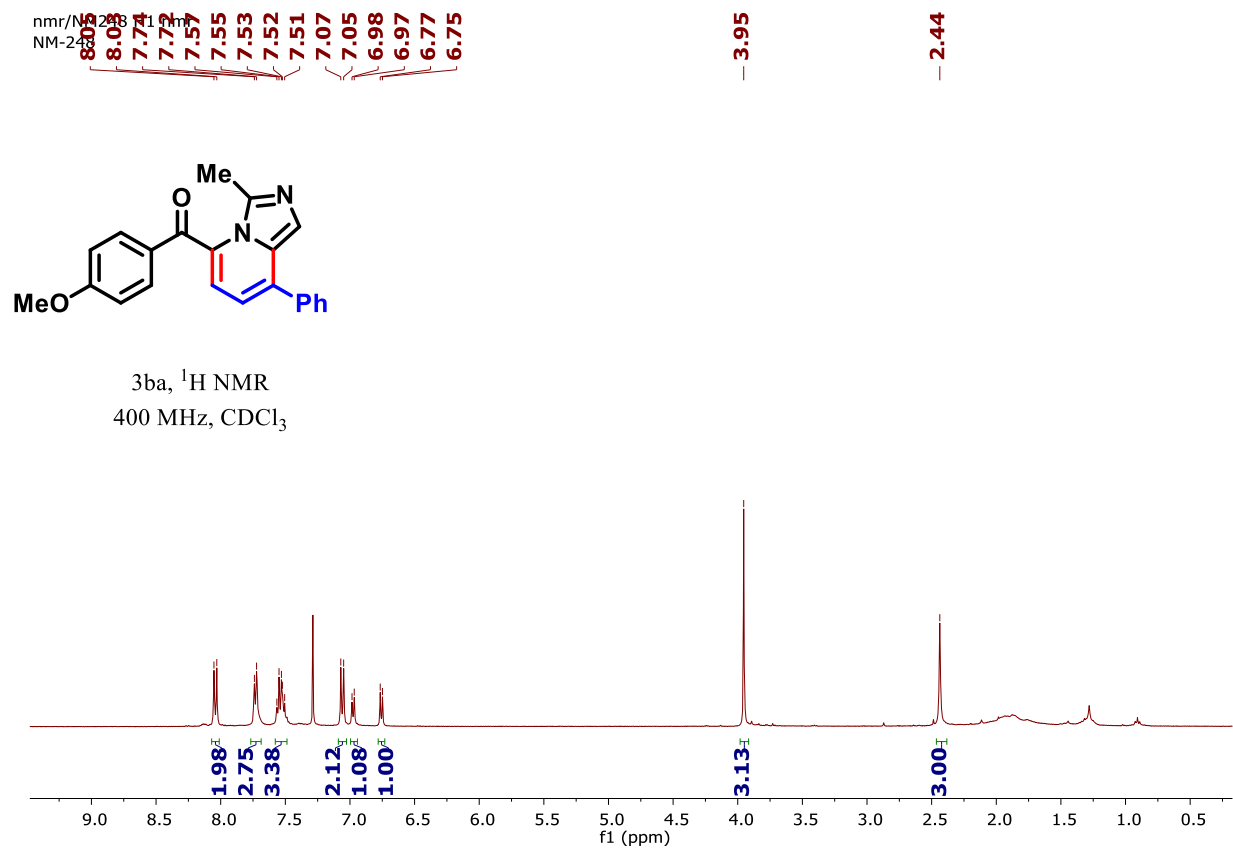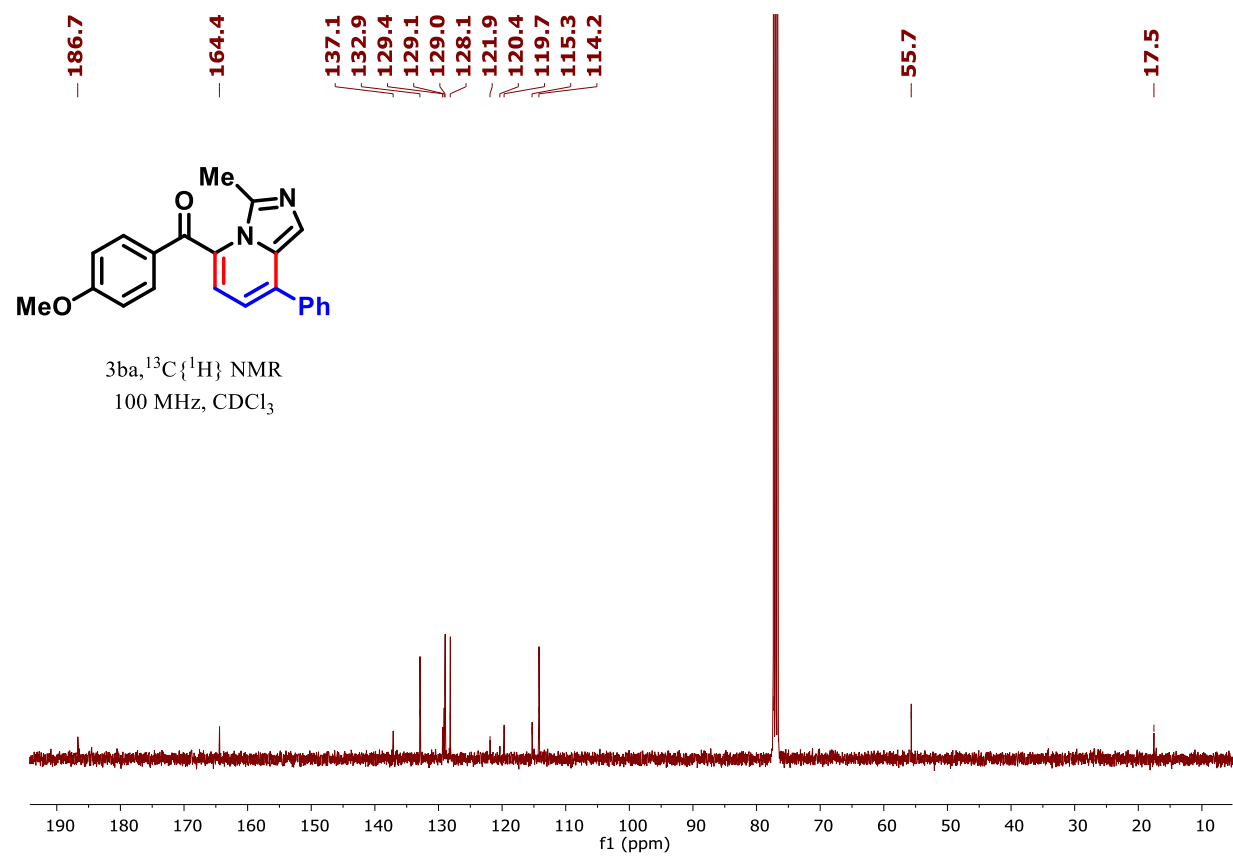

Sep30-2020.8.fid  
SD-1104

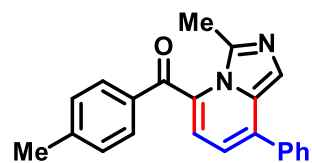

3ca,  $^1\text{H}$  NMR  
400 MHz,  $\text{CDCl}_3$

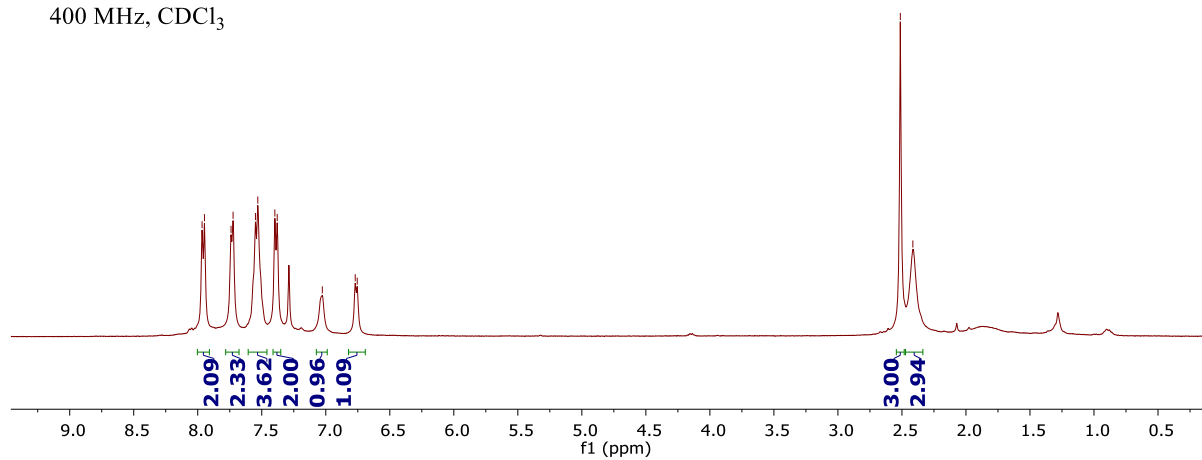

Sep30-2020.9.fid  
SD-1104

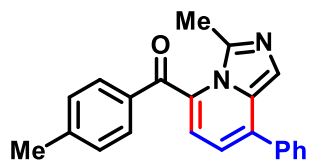

3ca,  $^{13}\text{C}\{^1\text{H}\}$  NMR  
100 MHz,  $\text{CDCl}_3$

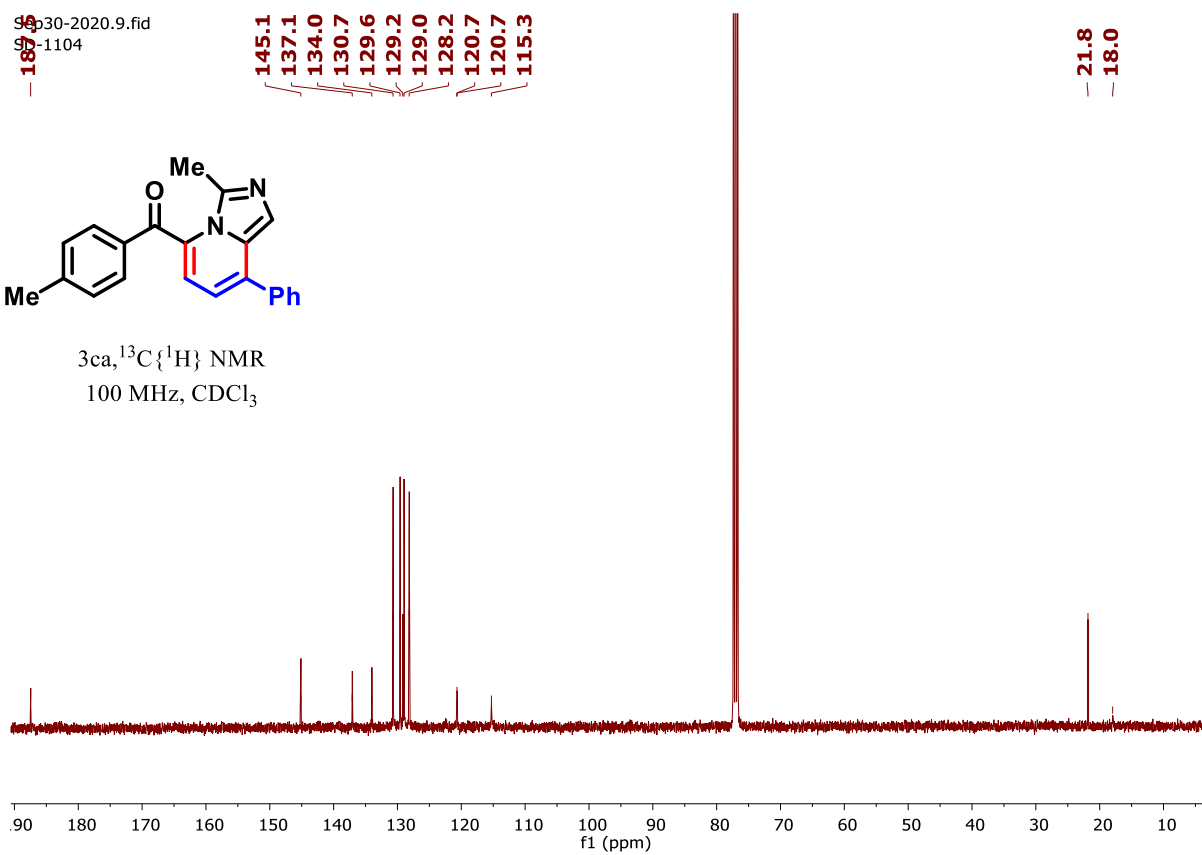

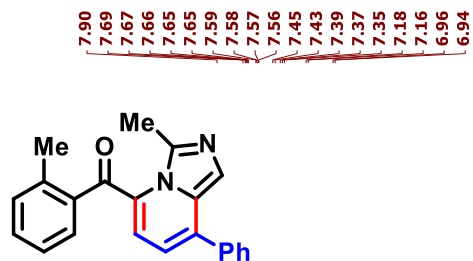

3da,  $^1\text{H}$  NMR  
400 MHz,  $\text{CDCl}_3$

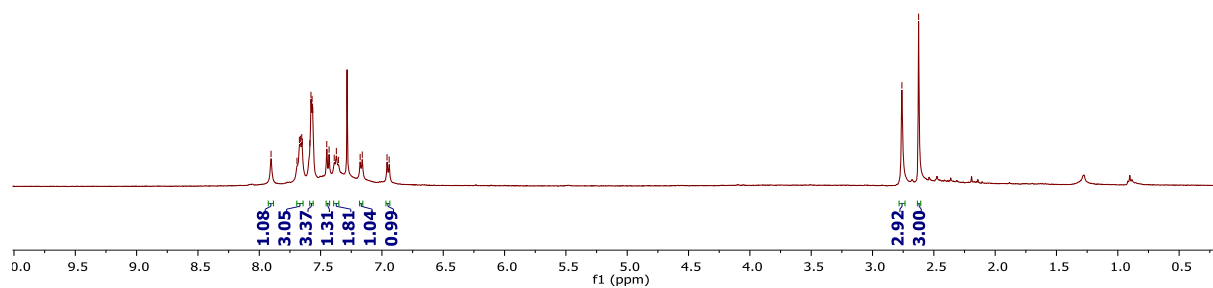

Dec-05-2020.3.fid  
NM 188

139.6, 137.8, 136.9, 136.6, 132.2, 131.9, 131.2, 129.3, 129.0, 128.2, 125.6, 122.8, 122.7, 115.2.

20.9, 18.0.

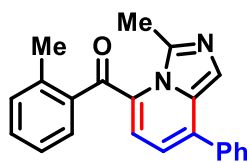

3da  $^{13}\text{C}\{^1\text{H}\}$  NMR  
100 MHz,  $\text{CDCl}_3$

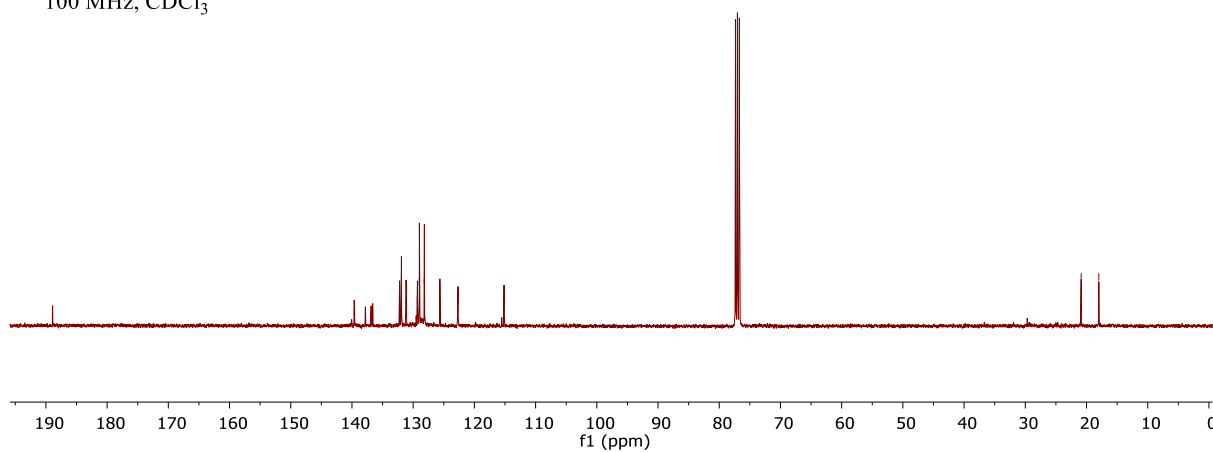

Apr12-2022.7.fid  
NM-257

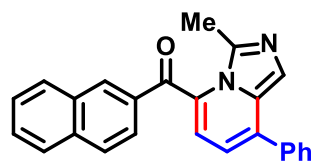

3fa,  $^1\text{H}$  NMR  
400 MHz,  $\text{CDCl}_3$

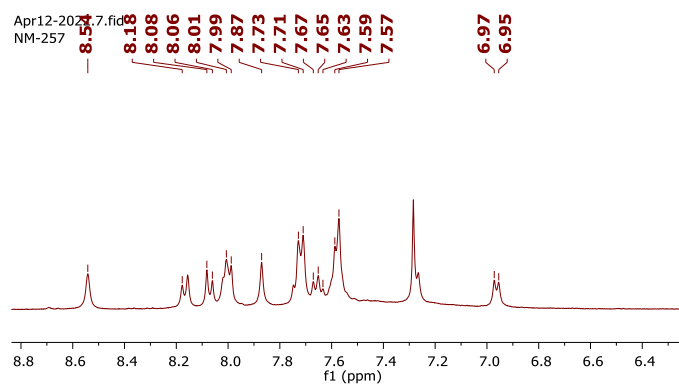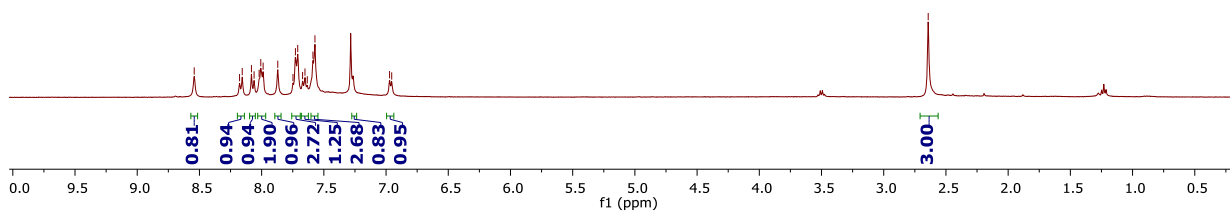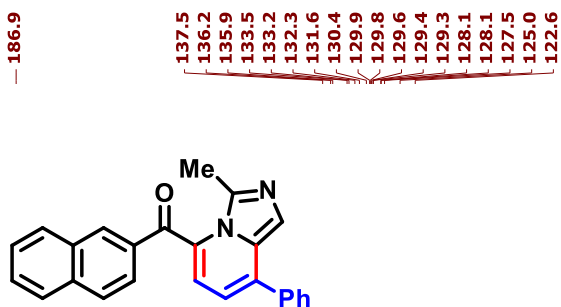

3fa,  $^{13}\text{C}\{^1\text{H}\}$  NMR  
100 MHz,  $\text{CDCl}_3$

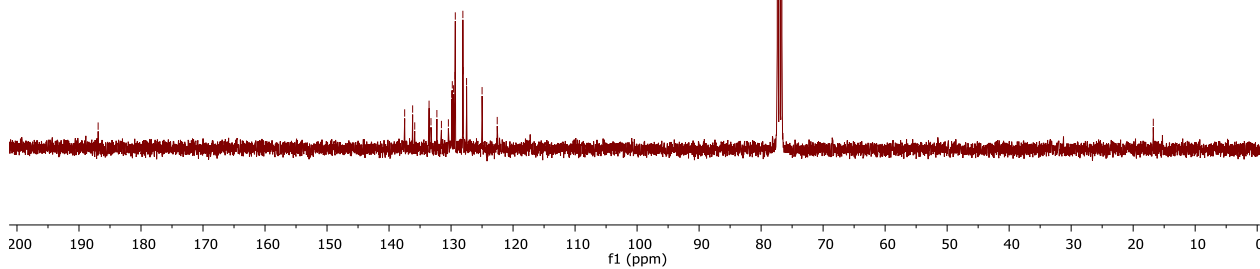

Jun02-2020.3.fid  
NM-185-I

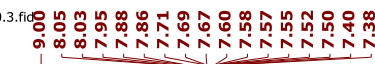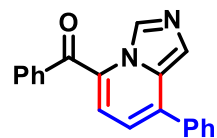

3ga,  $^1\text{H}$  NMR  
400 MHz,  $\text{CDCl}_3$

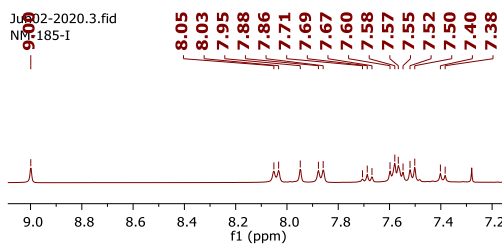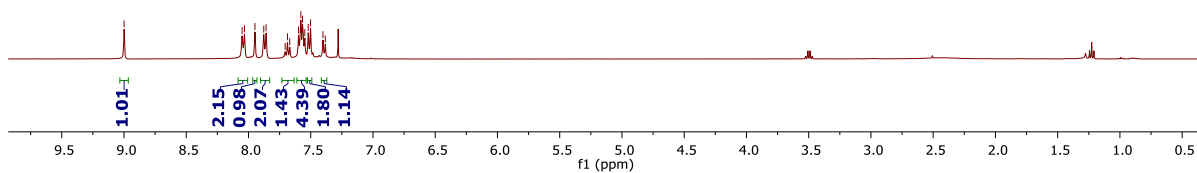

Jun23-2020.7.fid  
NM-185-I

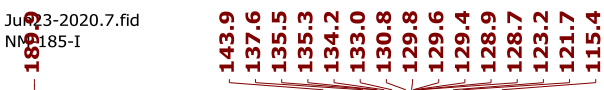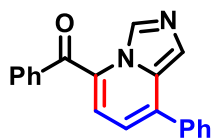

3ga,  $^{13}\text{C}\{^1\text{H}\}$  NMR  
100 MHz,  $\text{CDCl}_3$

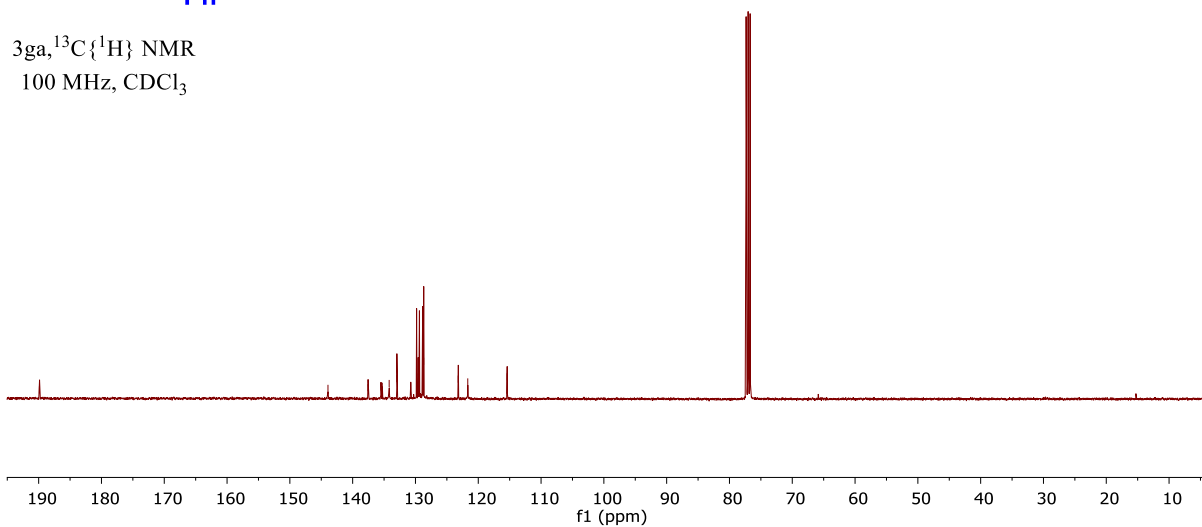

8.15  
8.13  
7.85  
7.81  
7.66  
7.64  
7.62  
7.58  
7.52  
7.50  
7.48  
7.44  
6.53  
6.49

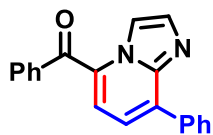

4ga,  $^1\text{H}$  NMR  
400 MHz,  $\text{CDCl}_3$

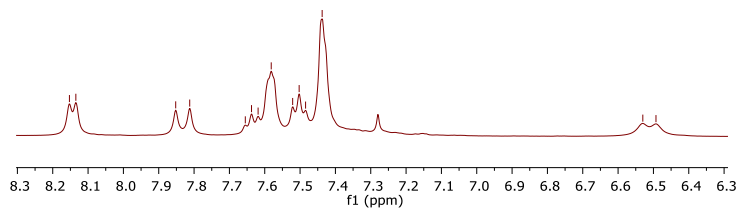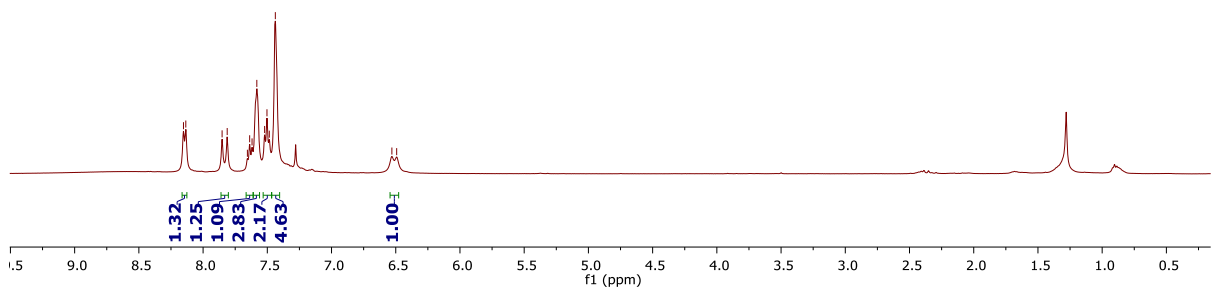

191.4  
145.3  
140.8  
137.5  
135.7  
133.3  
133.1  
131.6  
130.7  
130.6  
129.6  
129.5  
129.4  
129.3  
129.1  
129.1  
128.6  
128.3  
127.7  
121.3

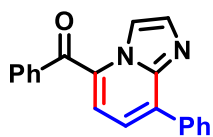

4ga,  $^{13}\text{C}\{^1\text{H}\}$  NMR  
100 MHz,  $\text{CDCl}_3$

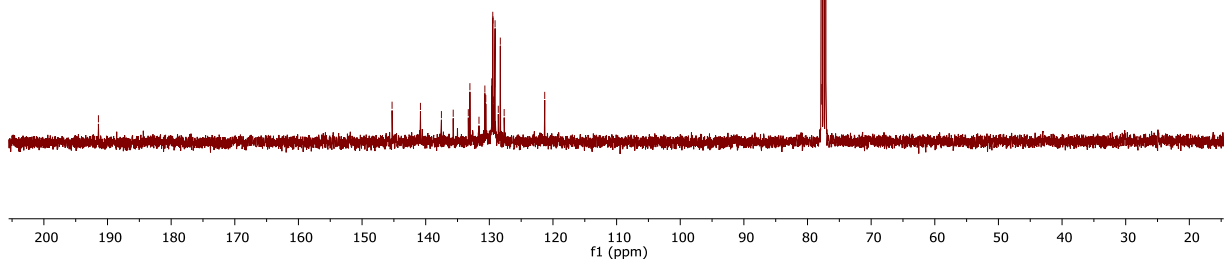

Apr11-2022.4.fid  
NM-804

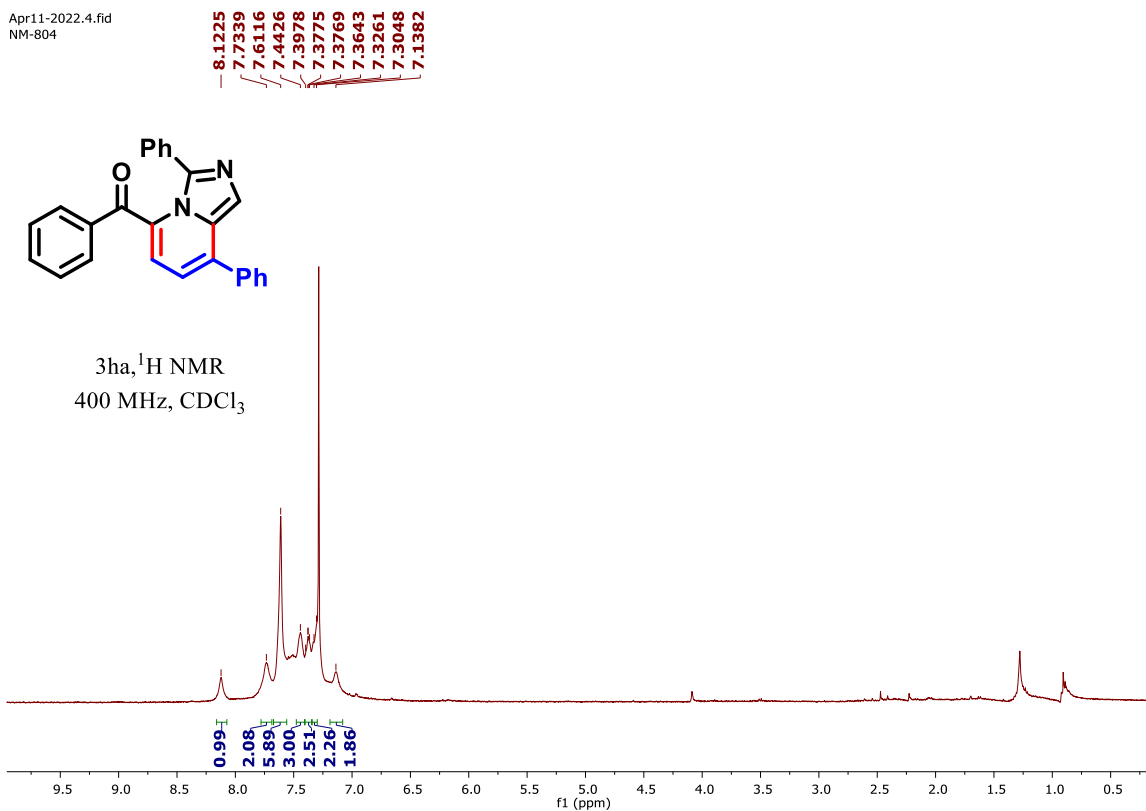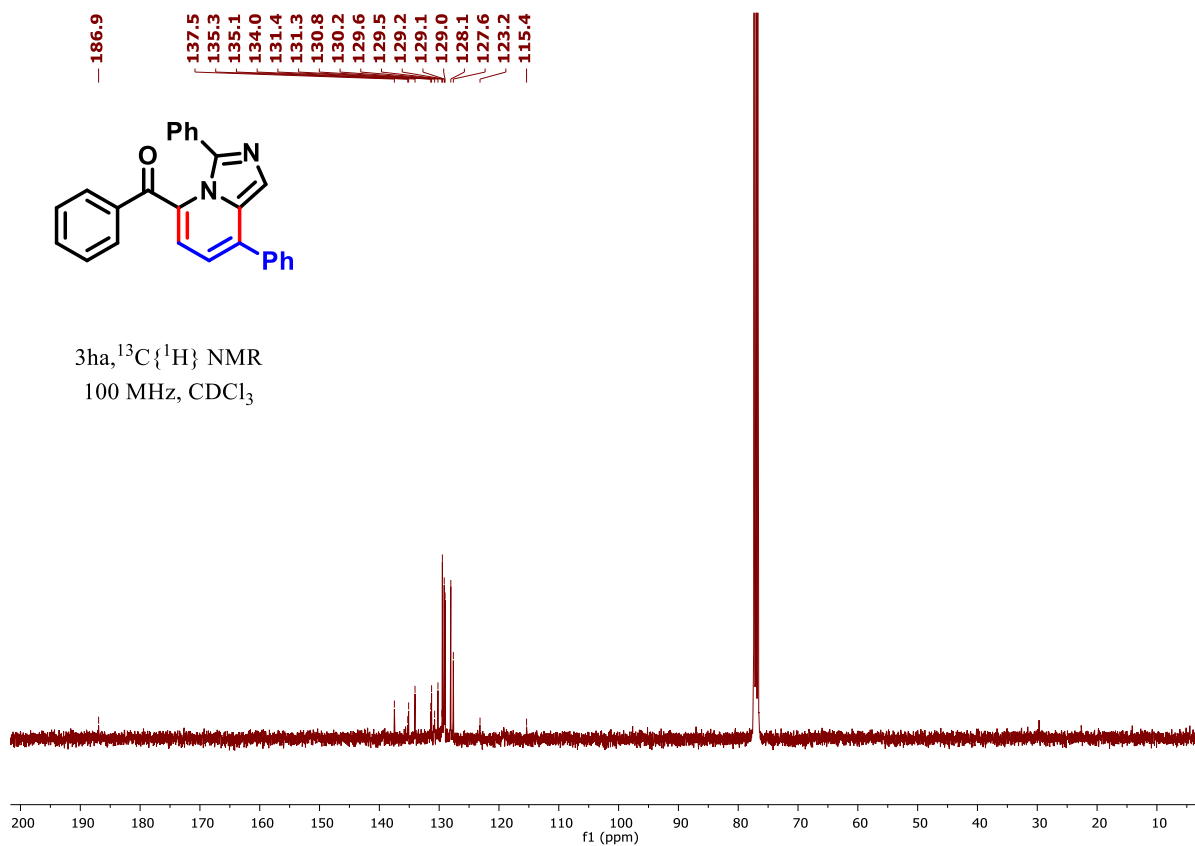



Apr15-2022.9.fid  
NM-301

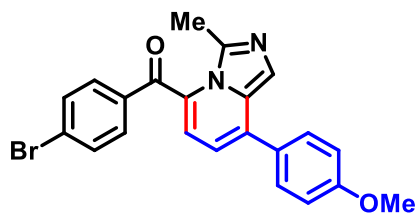

3ic,  $^1\text{H}$  NMR  
400 MHz,  $\text{CDCl}_3$

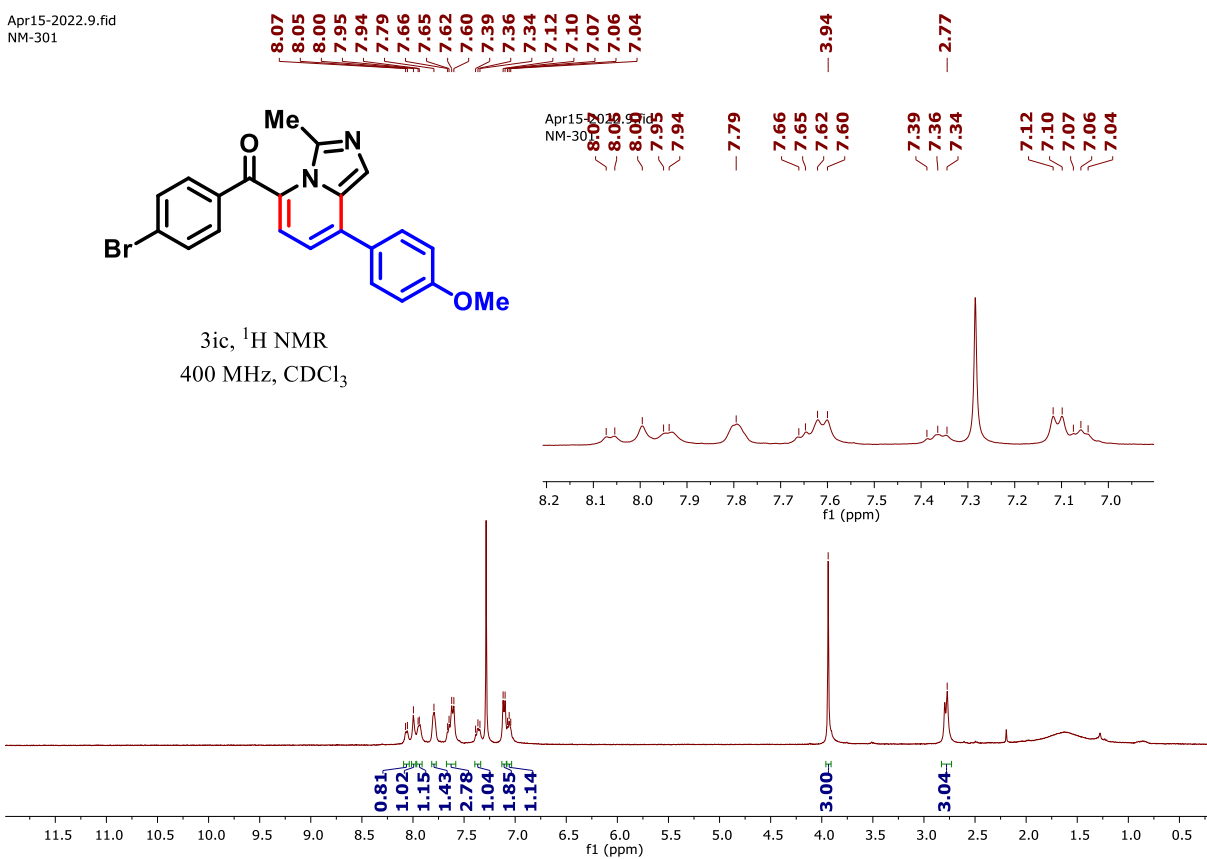

nmr1/NM-301 C13 NMR  
NM-301

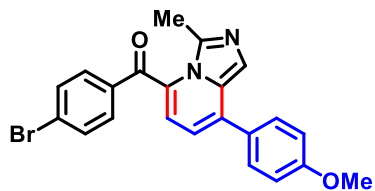

3ic,  $^{13}\text{C}\{^1\text{H}\}$  NMR  
100 MHz,  $\text{CDCl}_3$

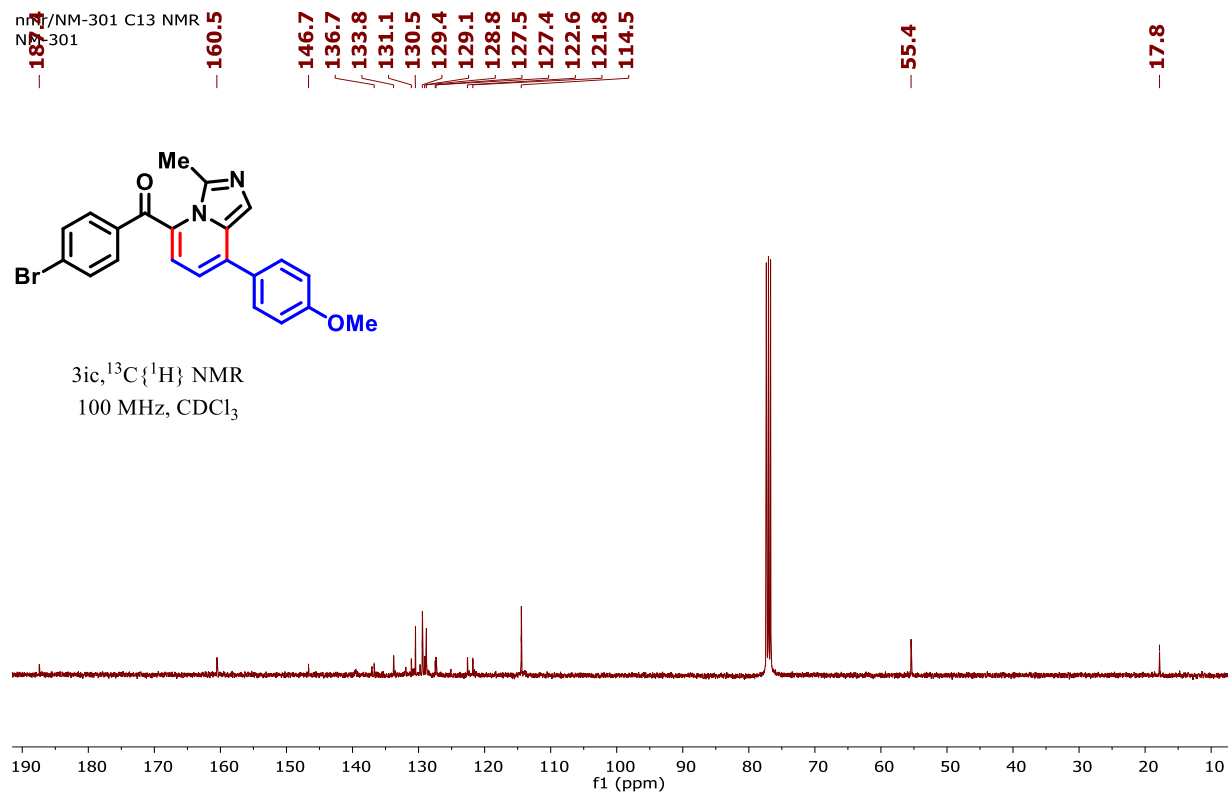

Apr09-2022.123.fid  
NM-311

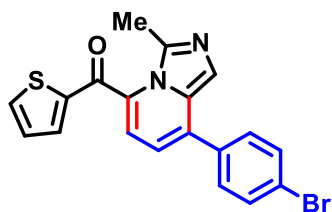

3jd,  $^1\text{H}$  NMR  
400 MHz,  $\text{CDCl}_3$

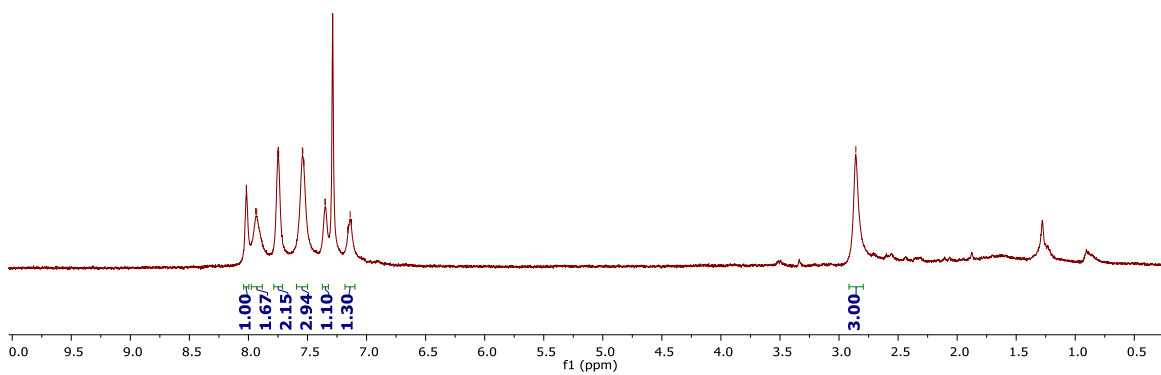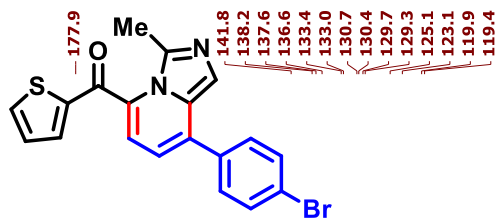

3jd,  $^{13}\text{C}\{^1\text{H}\}$  NMR  
100 MHz,  $\text{CDCl}_3$

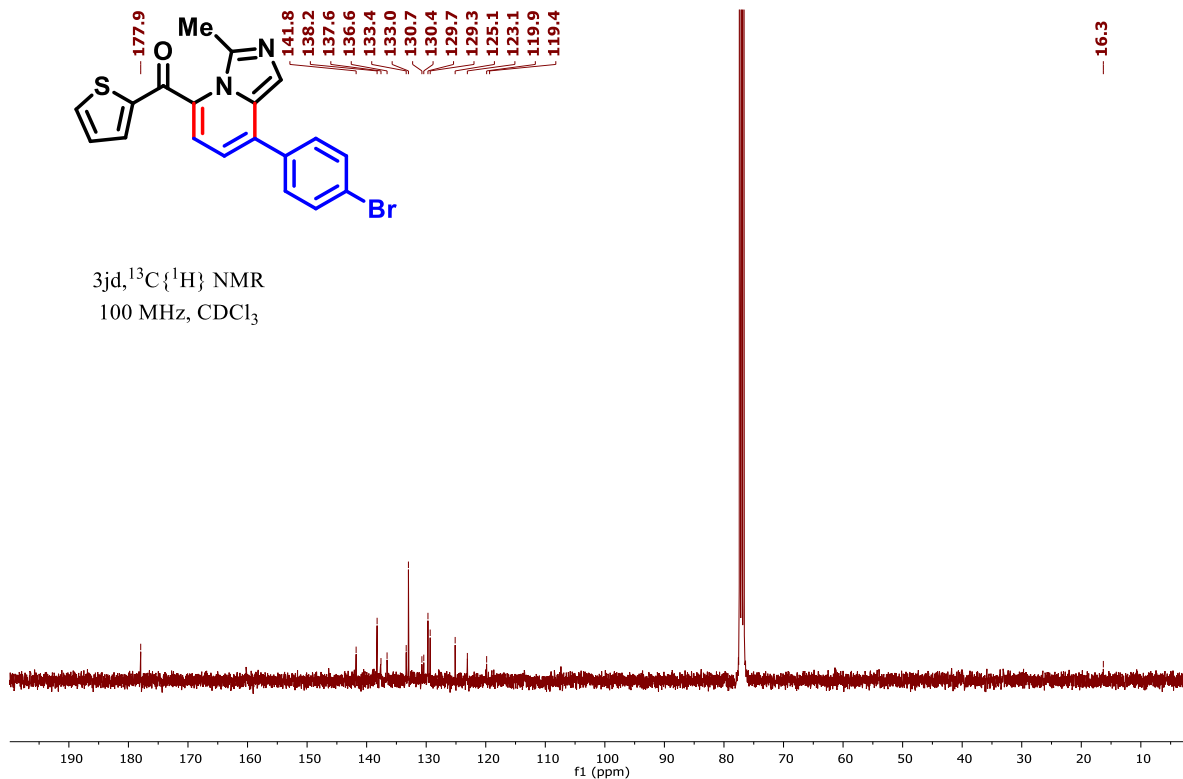

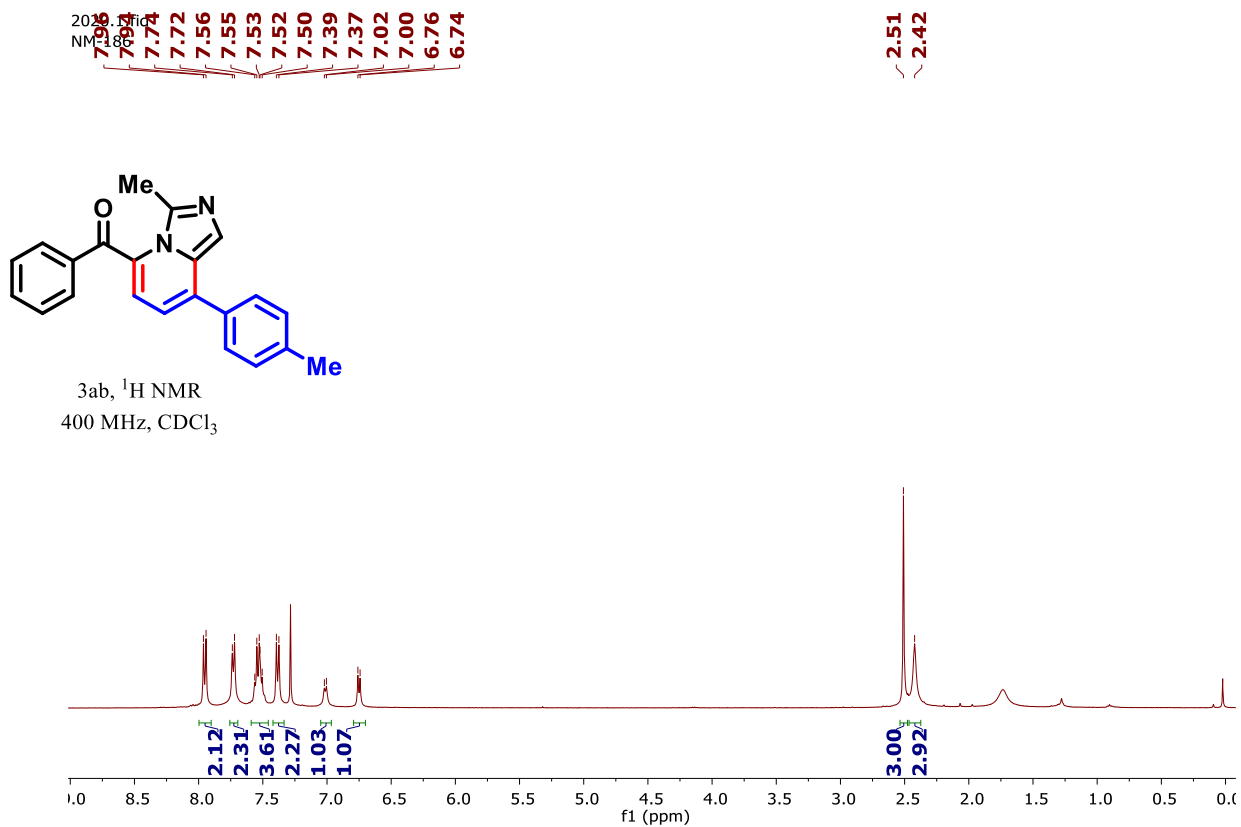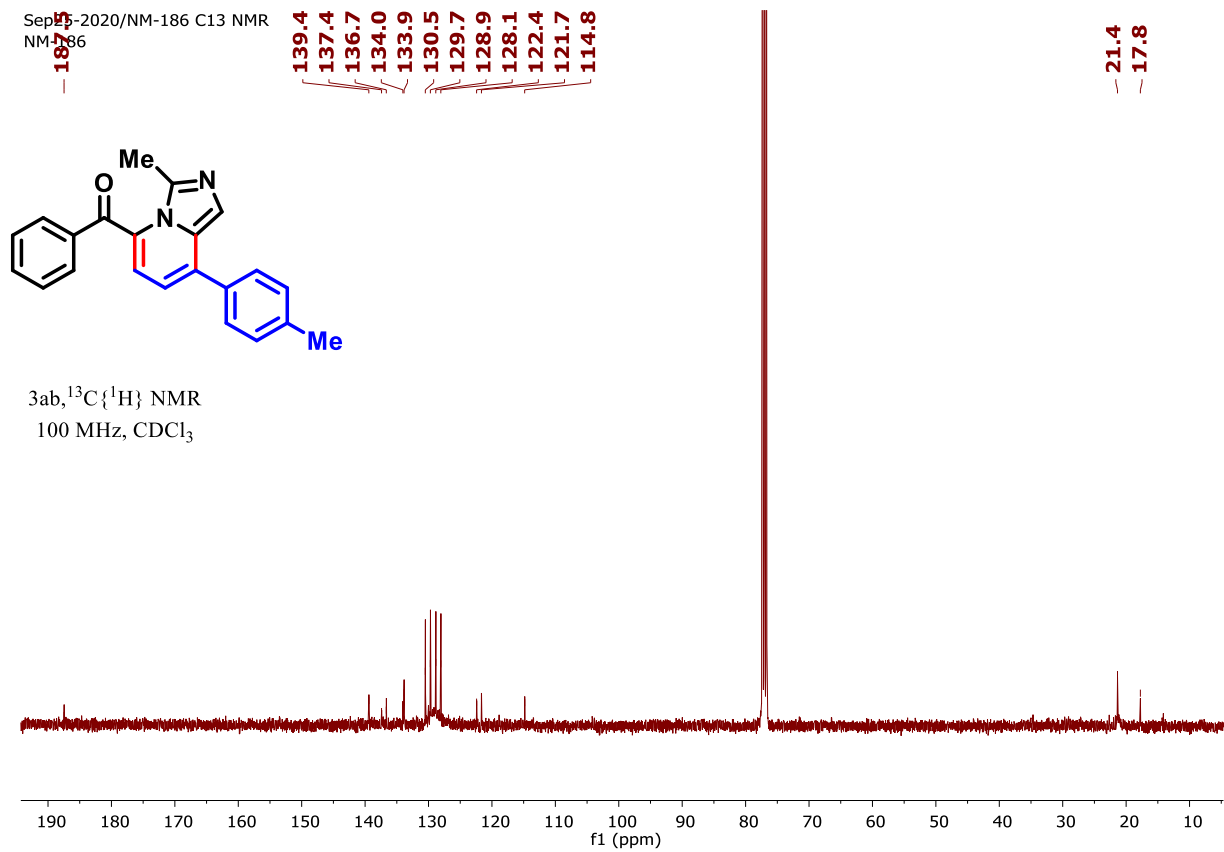

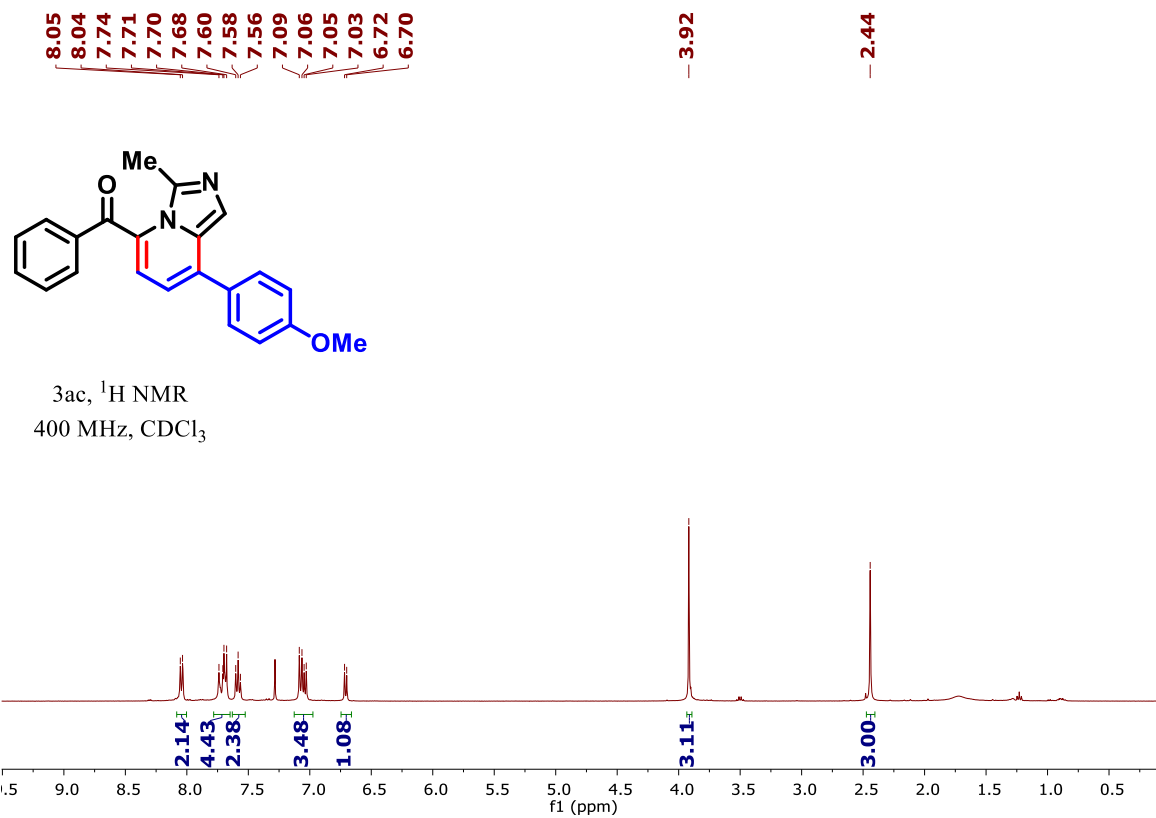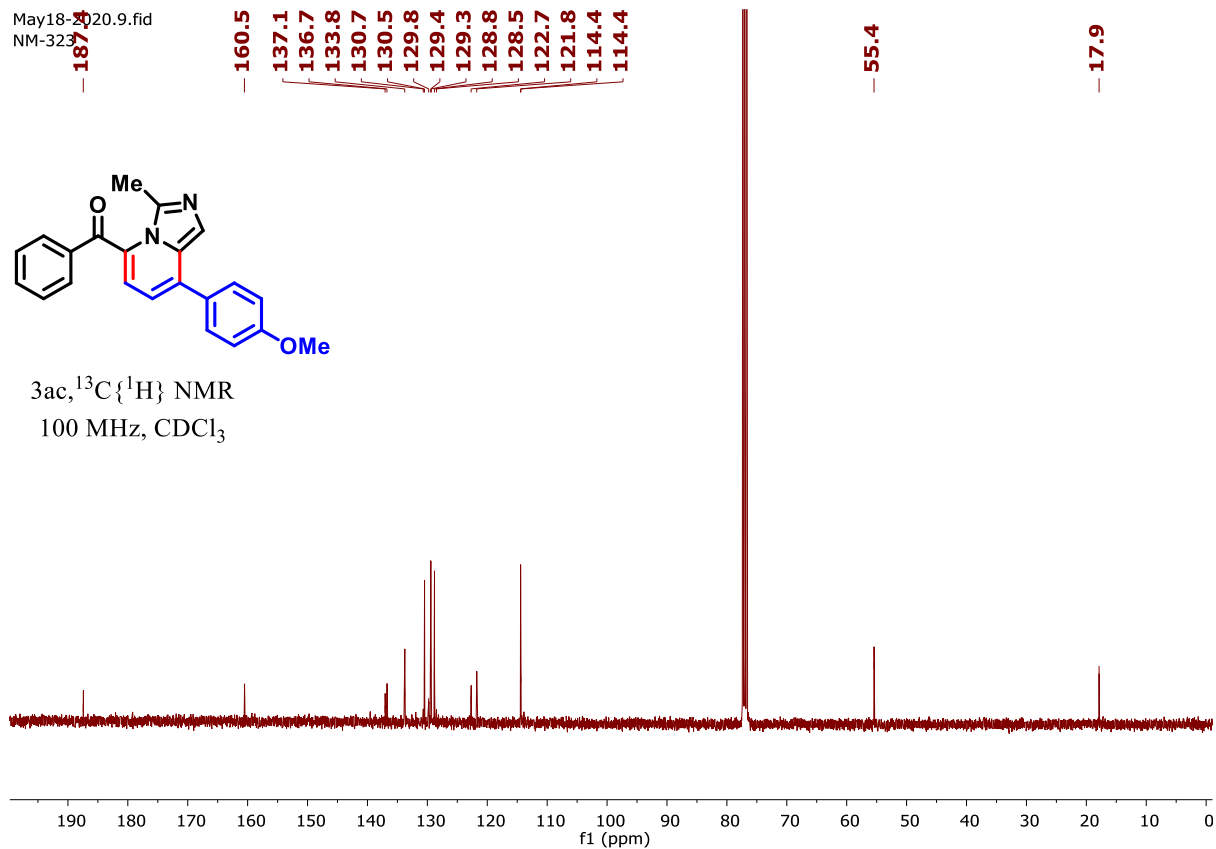

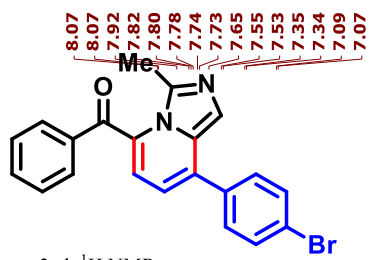

3ad,  $^1\text{H}$  NMR  
400 MHz,  $\text{CDCl}_3$

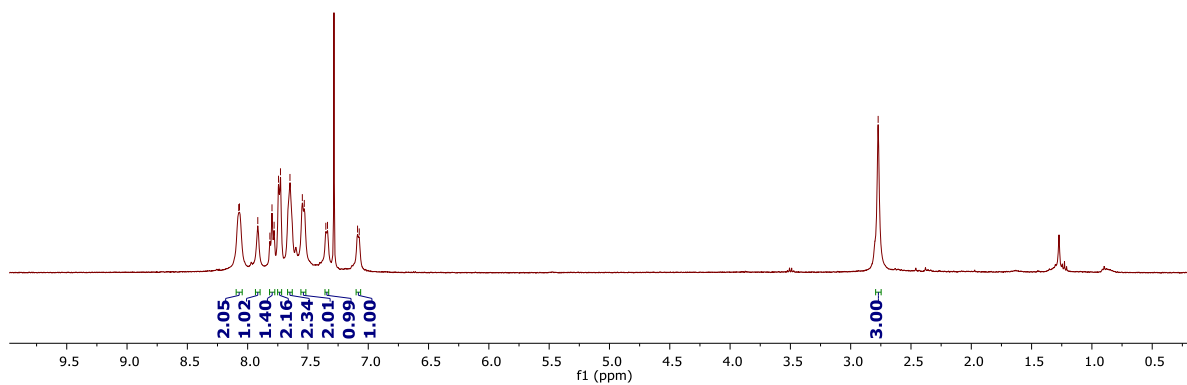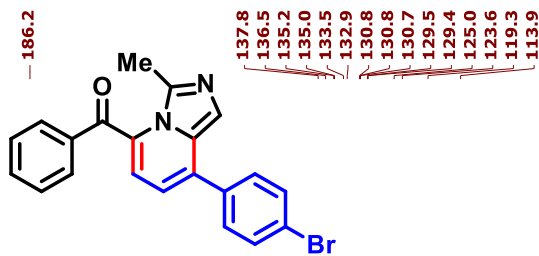

3ad,  $^{13}\text{C}$  NMR  
100 MHz,  $\text{CDCl}_3$

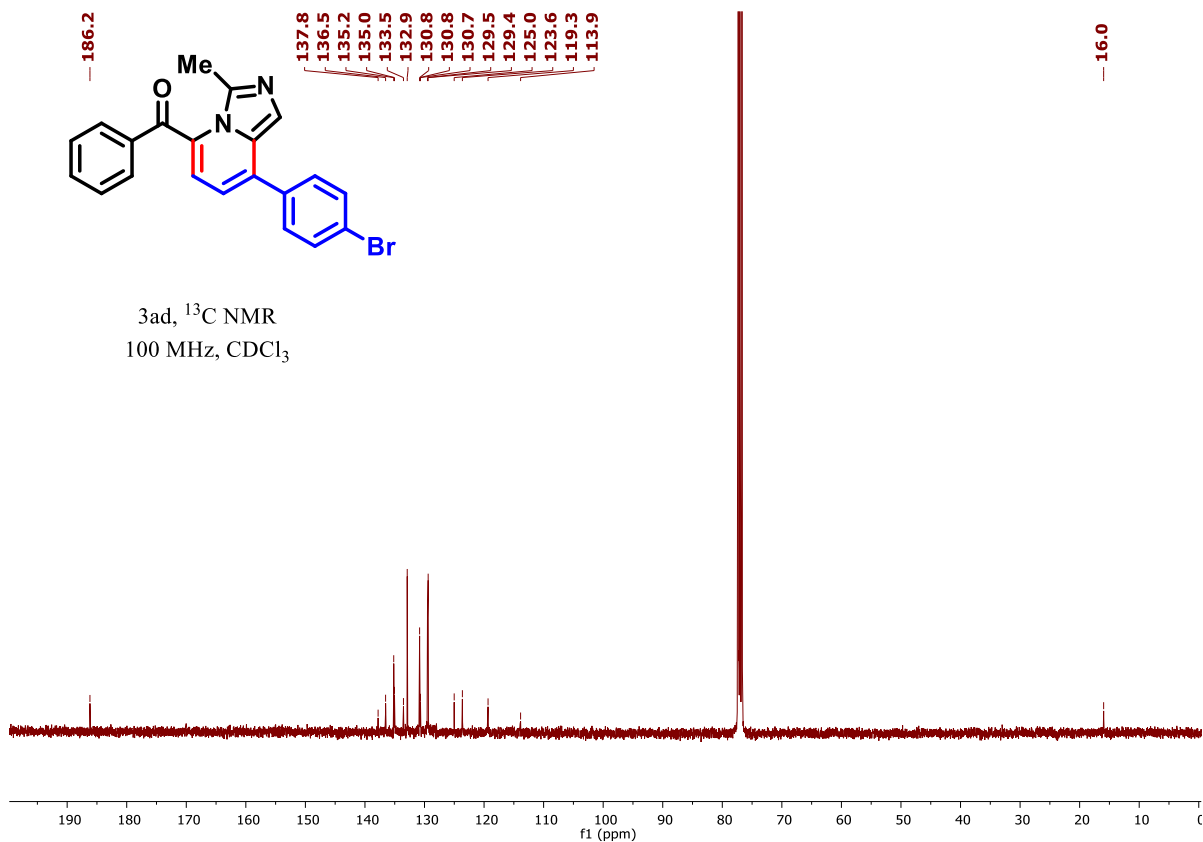

<sup>1</sup>H NMR  
 400 MHz, CDCl<sub>3</sub>  
 7.80, 7.78, 7.76, 7.69, 7.66, 7.59, 7.57, 7.56, 7.51, 6.99, 6.75, 6.74, 2.42

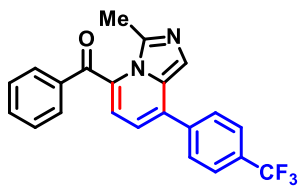

3ae, <sup>1</sup>H NMR  
 400 MHz, CDCl<sub>3</sub>

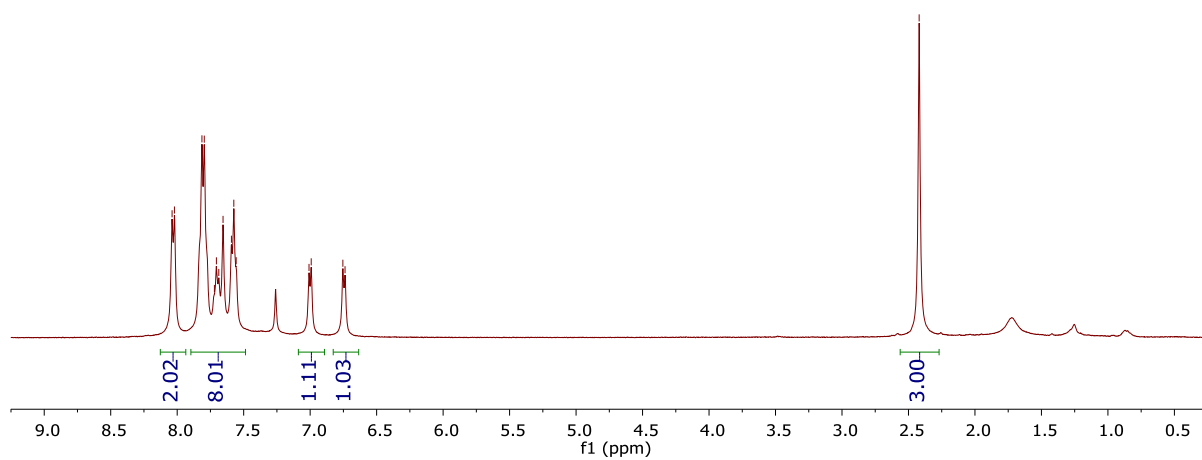

187.6

140.6, 139.7, 136.4, 135.4, 134.1, 131.5, 131.0, 131.0, 130.5, 128.9, 128.5, 126.0, 126.0, 125.9, 125.3, 122.6, 122.2, 120.3, 115.7

17.8

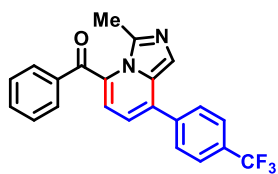

3ae, <sup>13</sup>C{<sup>1</sup>H} NMR  
 100 MHz, CDCl<sub>3</sub>

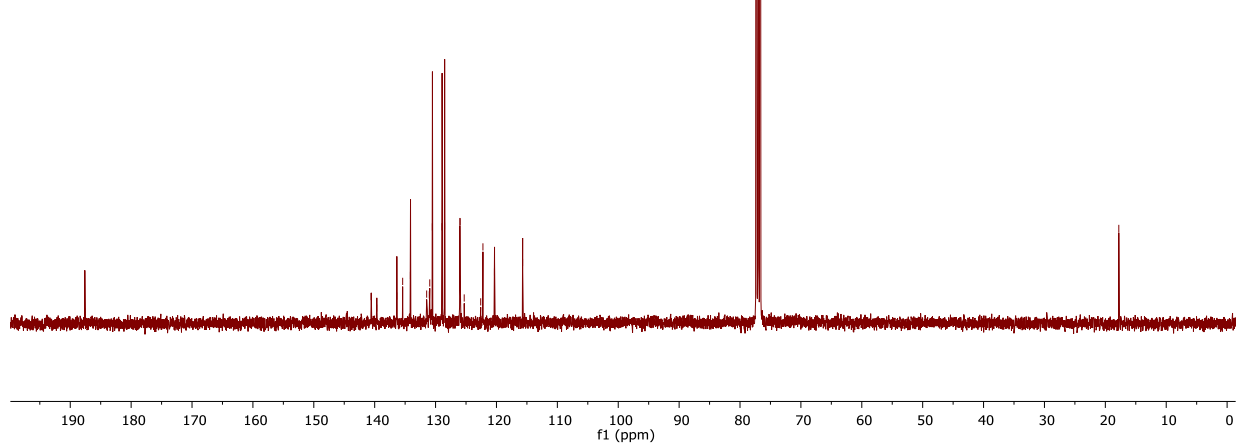

nmr/NM-348  
NM-348

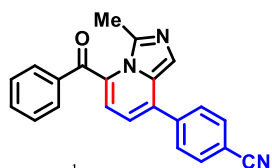

3af,  $^1\text{H}$  NMR  
400 MHz,  $\text{CDCl}_3$

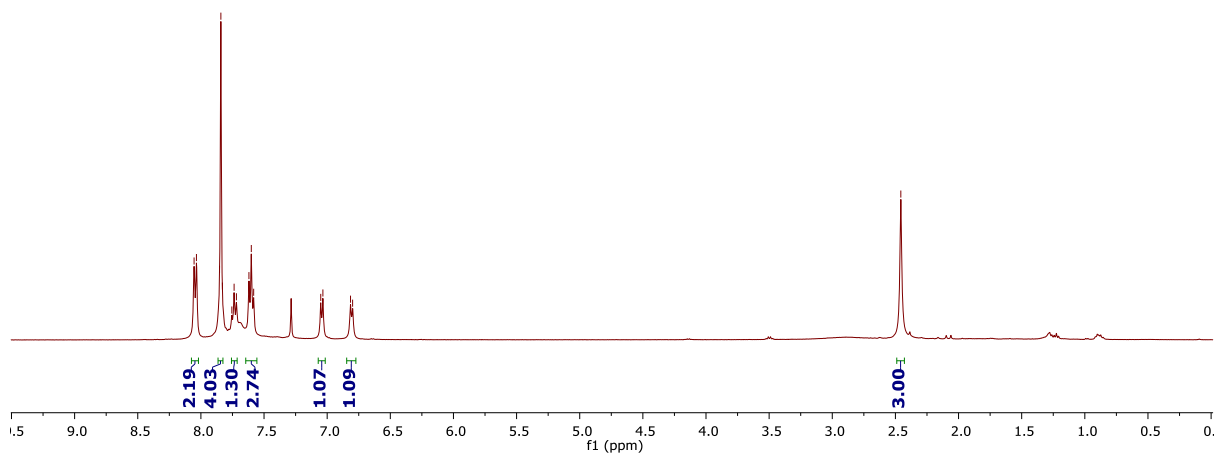

nmr/NM-348 C13 NMR  
NM-348

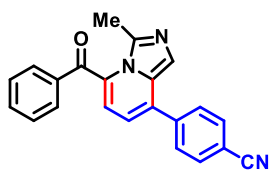

3af,  $^{13}\text{C}$  NMR  
100 MHz,  $\text{CDCl}_3$

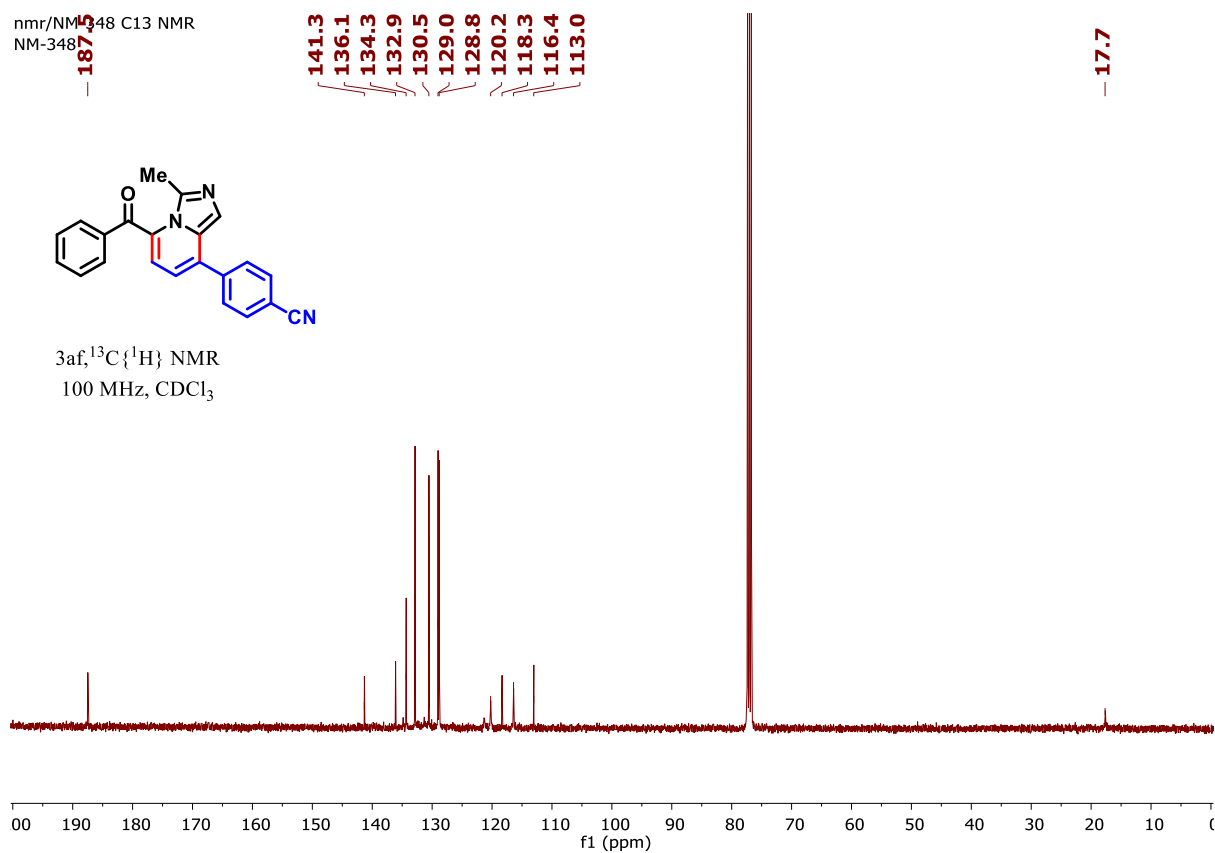

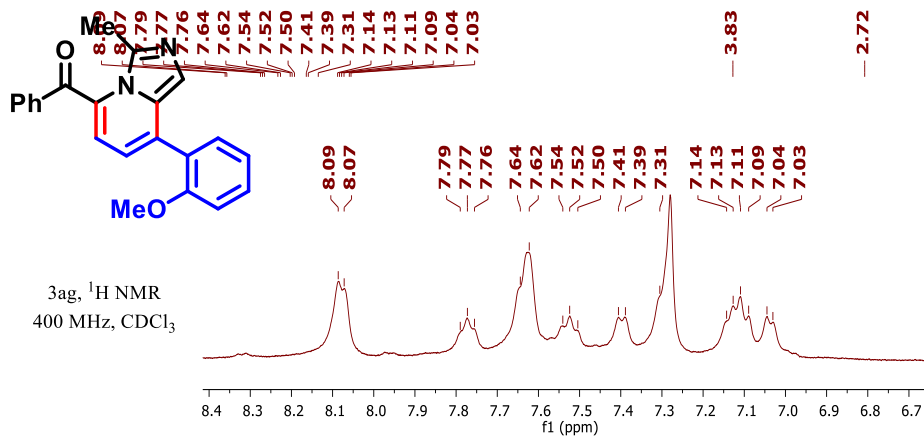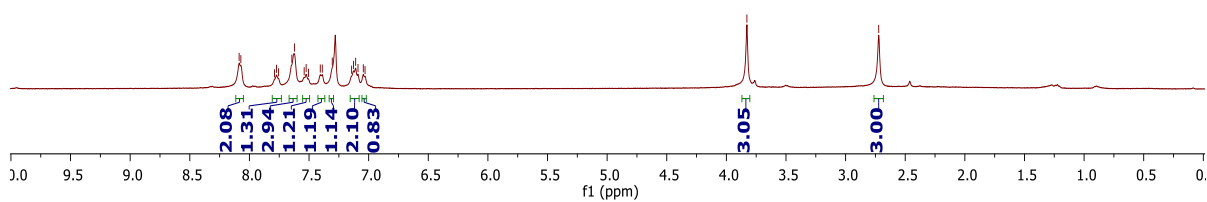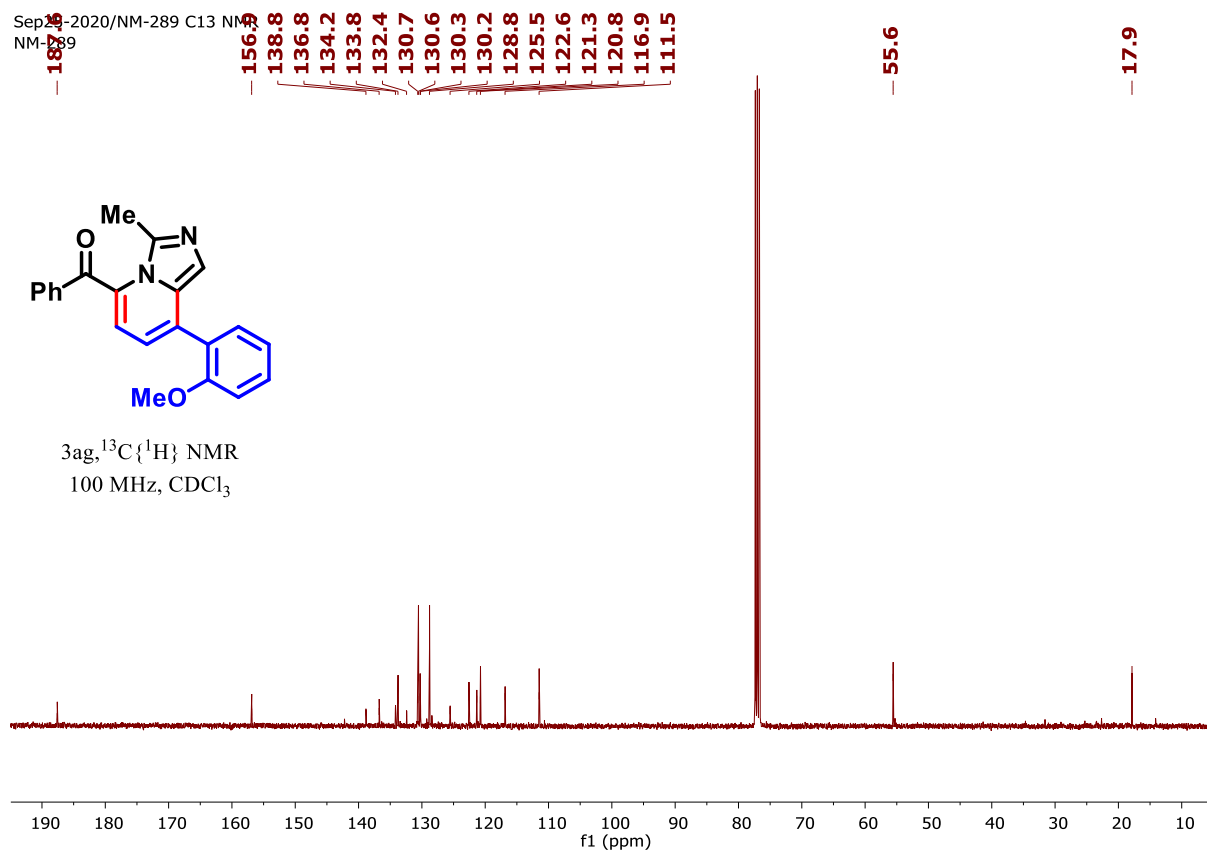



8.01  
7.99  
7.70  
7.68  
7.66  
7.63  
7.62  
7.57  
7.55  
7.53  
7.48  
7.47  
7.22  
7.21  
7.20  
6.97  
6.95  
6.90  
6.88

— 2.41

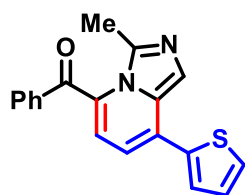

3ah,  $^1\text{H}$  NMR  
400 MHz,  $\text{CDCl}_3$

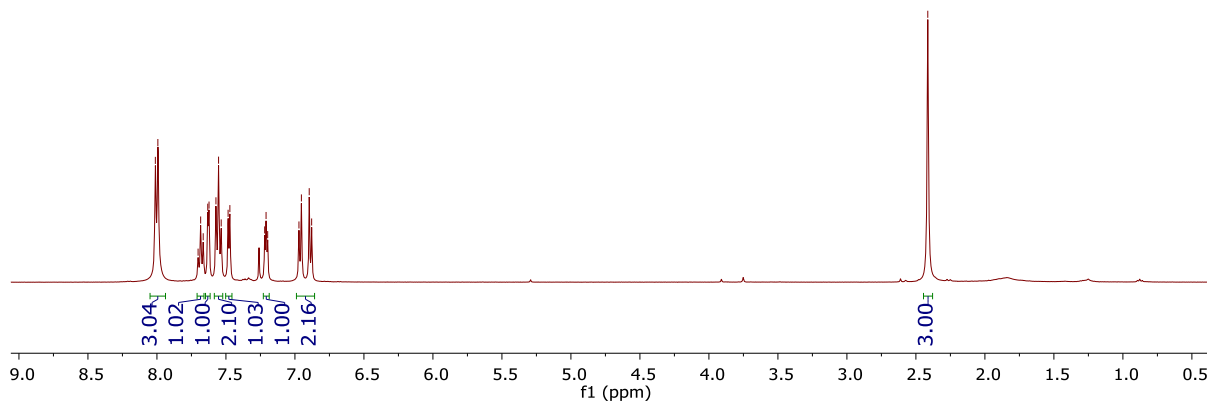

nmr/NM-288c13 nmr  
nm-288

— 187.2

138.8  
136.5  
133.9  
130.5  
130.3  
129.8  
128.9  
128.1  
127.1  
127.0  
122.8  
120.9

— 17.9

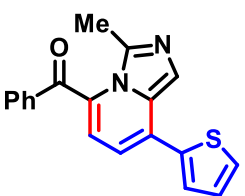

3ah,  $^{13}\text{C}\{^1\text{H}\}$  NMR  
100 MHz,  $\text{CDCl}_3$

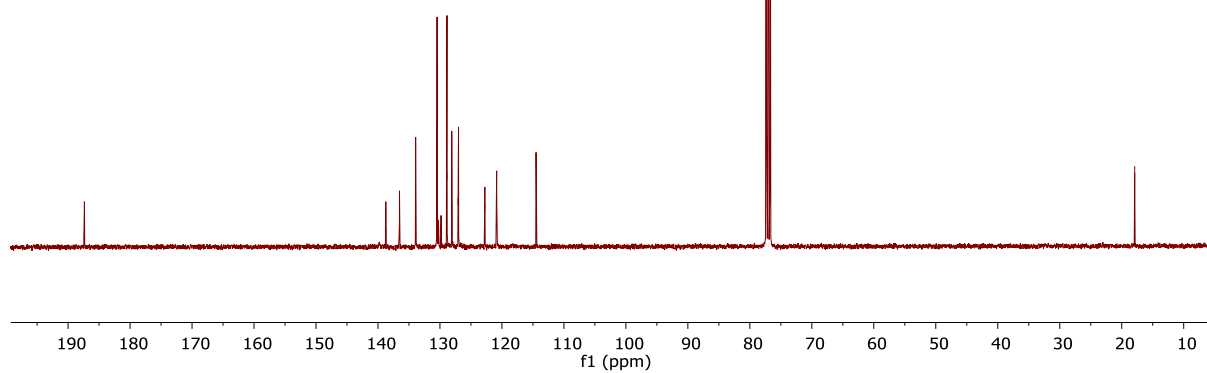

Revision work  
NM-808

8.11  
8.02  
8.00  
7.78  
7.77  
7.77  
7.70  
7.60  
7.58  
7.57  
7.21  
7.19  
7.13  
7.11  
7.07  
7.07  
6.66  
6.65

2.55

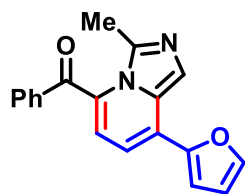

3ai,  $^1\text{H}$  NMR  
400 MHz,  $\text{CDCl}_3$

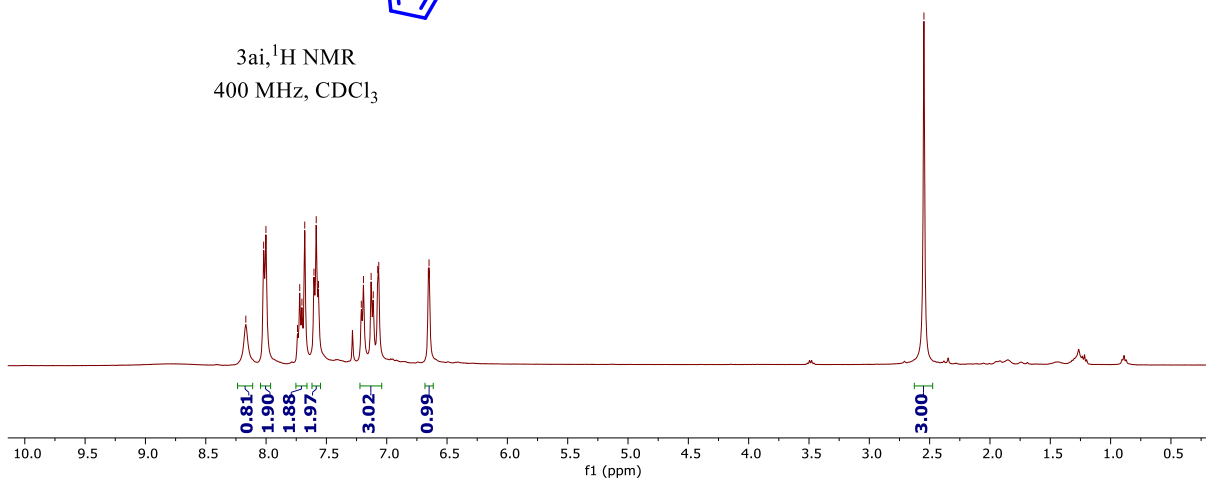

Revision work  
NM-808 C13 NMR

186.6  
149.2  
144.5  
136.0  
134.3  
130.5  
130.1  
129.0  
125.3  
122.2  
119.4  
113.0  
112.5  
111.4

17.1

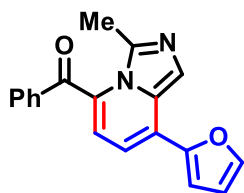

3ai,  $^{13}\text{C}\{^1\text{H}\}$  NMR  
100 MHz,  $\text{CDCl}_3$

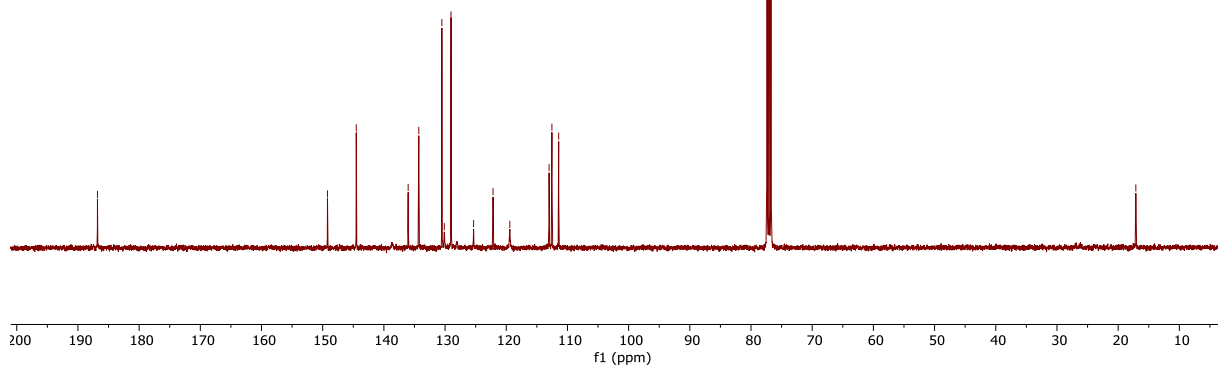

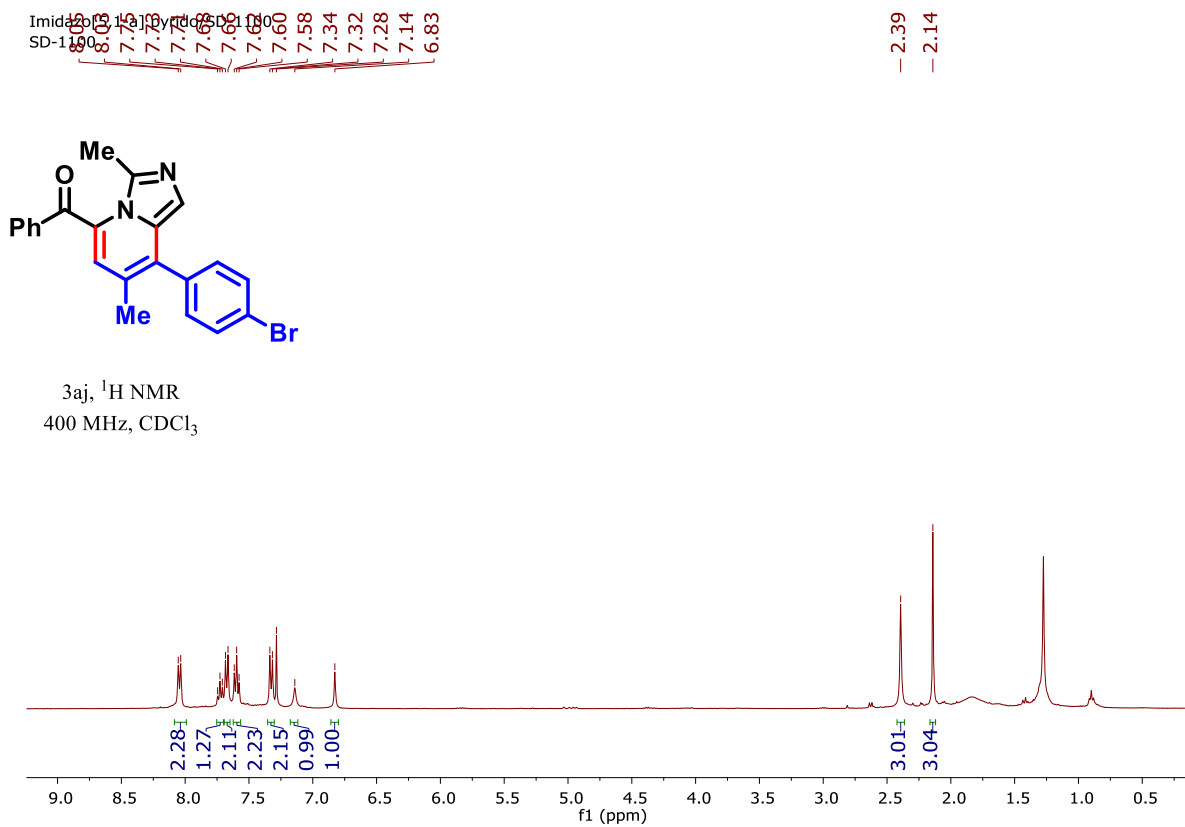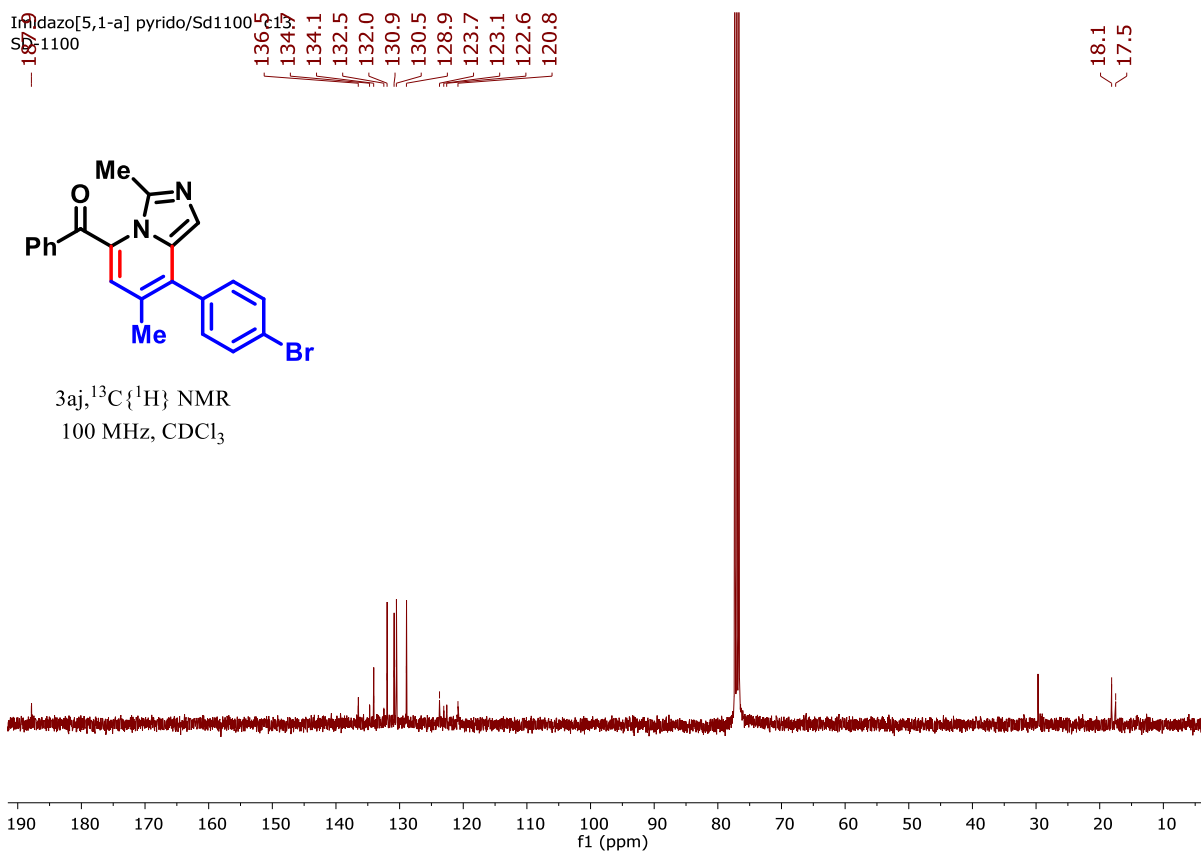

nmr/NM-302 h1 nmr  
NM-302

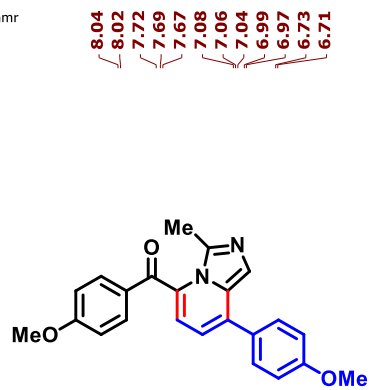

3bc,  $^1\text{H}$  NMR  
400 MHz,  $\text{CDCl}_3$

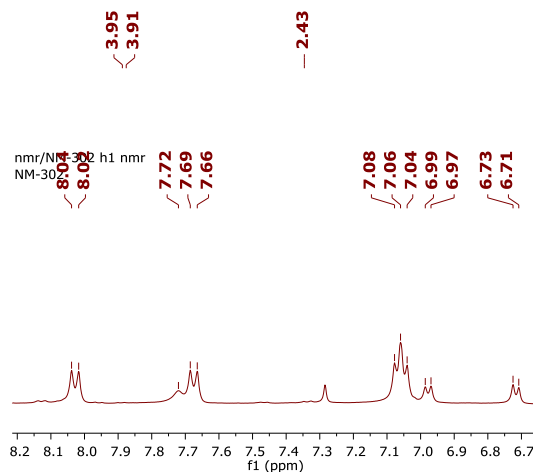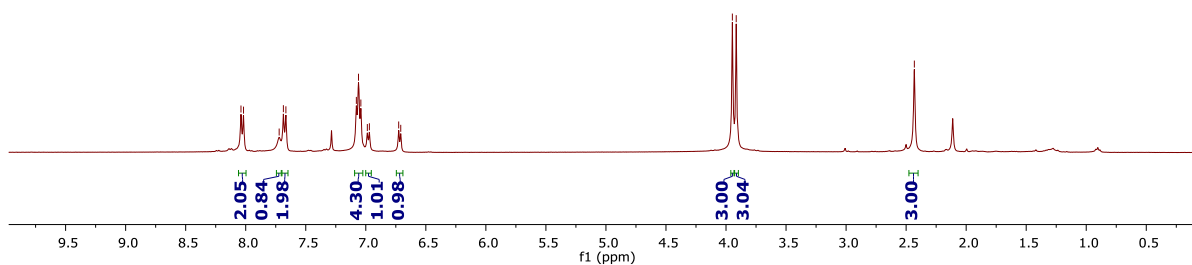

Apr13-2022.6.fid  
NM-302

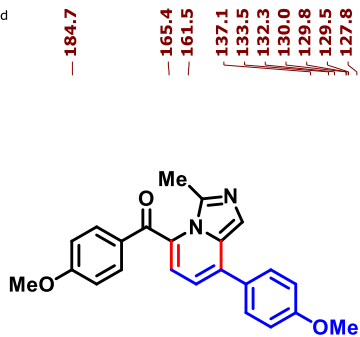

3bc,  $^{13}\text{C}\{^1\text{H}\}$  NMR  
100 MHz,  $\text{CDCl}_3$

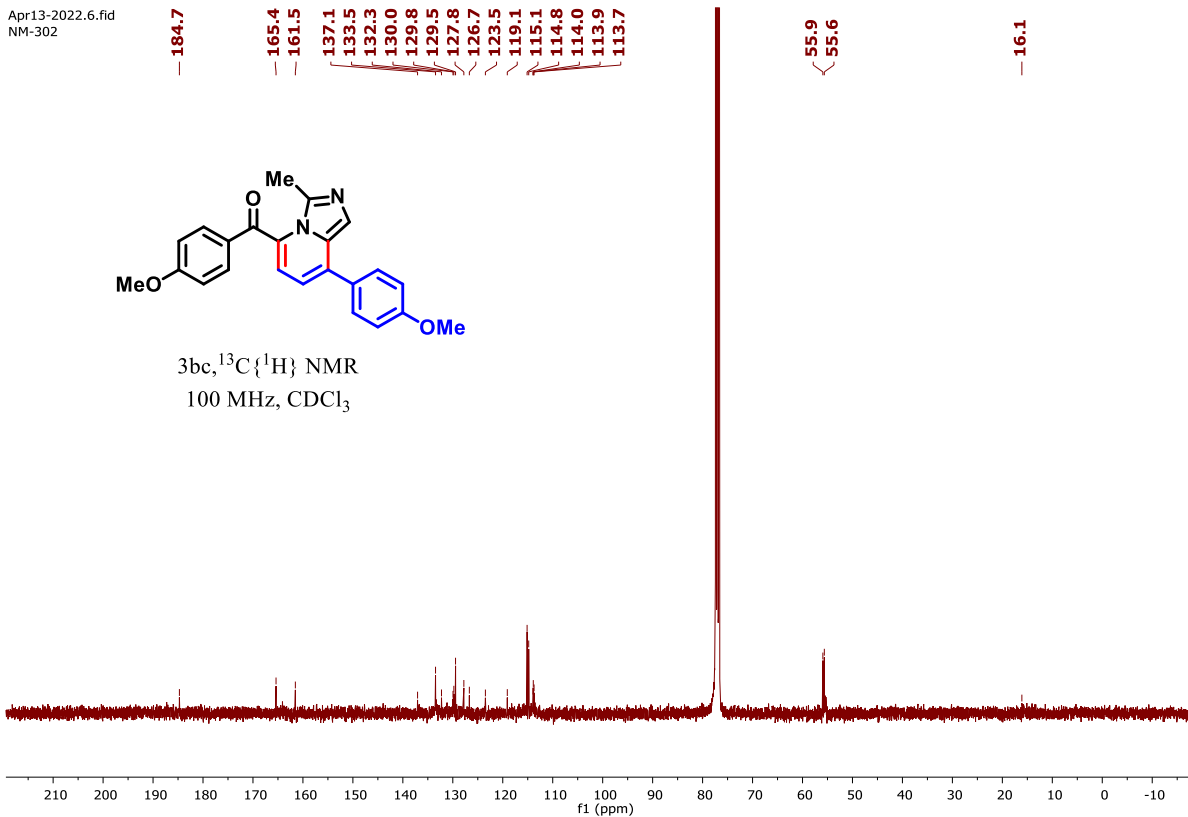

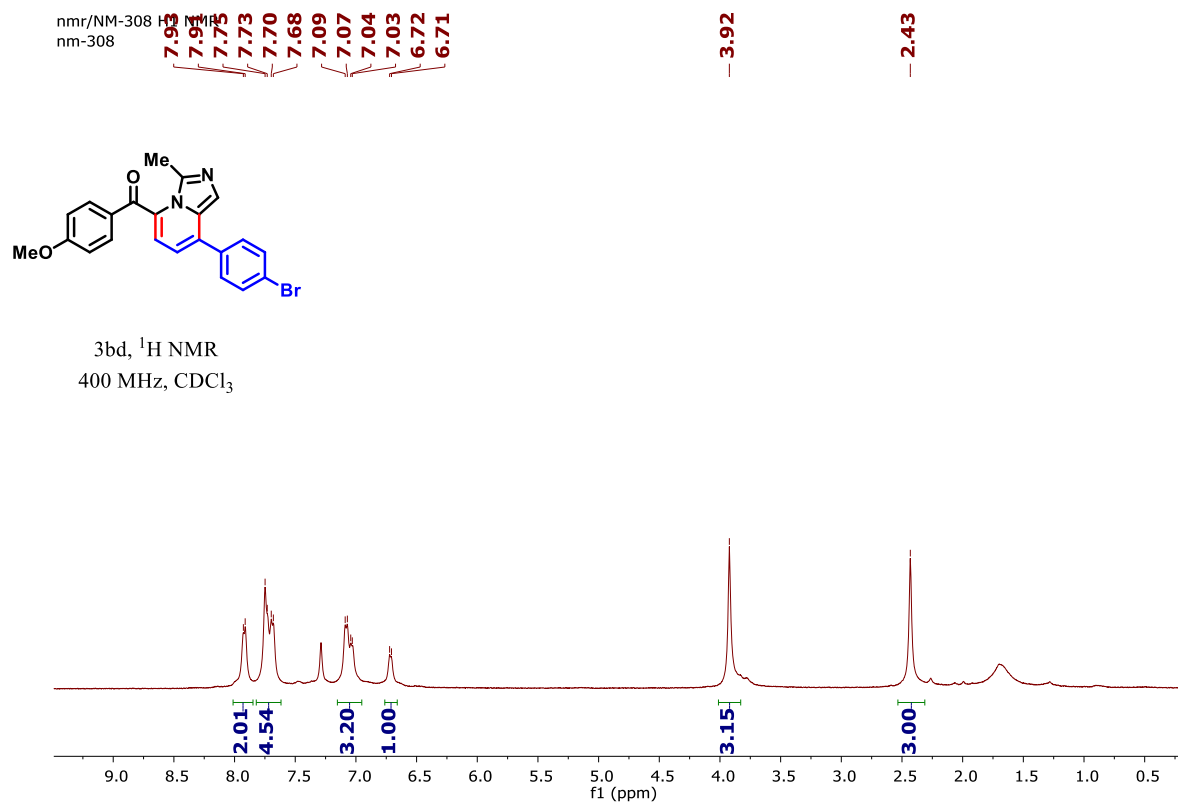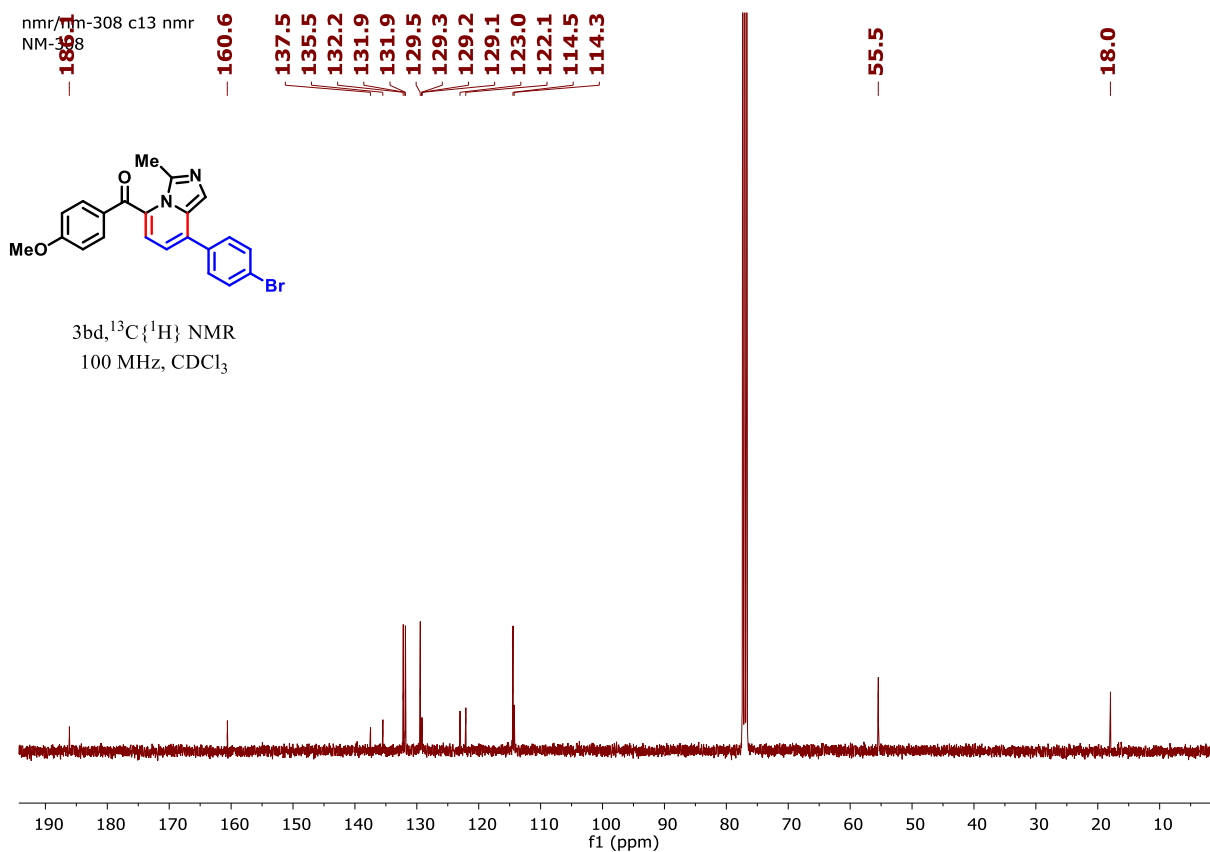

nmr repeated ( SHIV sir)/NM-434  
NM-434

7.98  
7.96  
7.48  
7.47  
7.43  
7.39  
7.37  
7.12  
7.10  
7.08  
7.07  
7.00  
6.98  
6.77  
6.75

3.83

2.51  
2.43

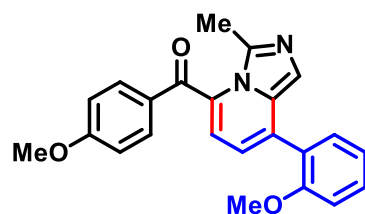

3bg,  $^1\text{H}$  NMR  
400 MHz,  $\text{CDCl}_3$

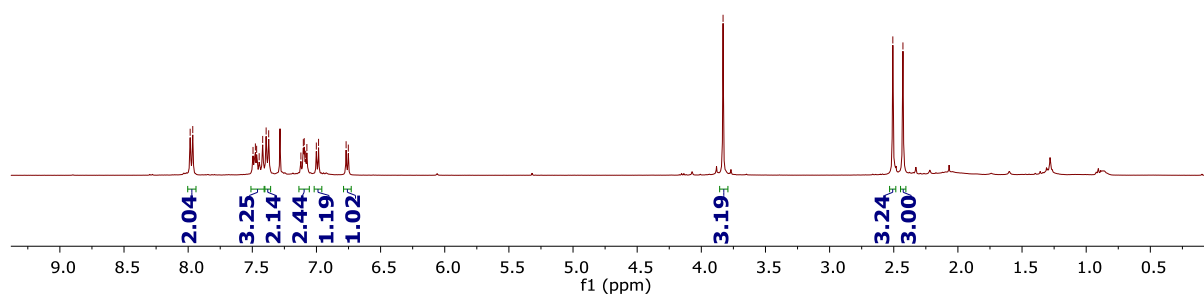

nmr repeated ( SHIV sir)/NM-434  
NM-434

187.5  
156.9  
145.0  
138.5  
134.1  
133.8  
132.4  
130.7  
130.7  
130.4  
130.2  
129.5  
125.6  
122.3  
120.7  
120.6  
116.9  
111.5

55.6

21.8  
17.7

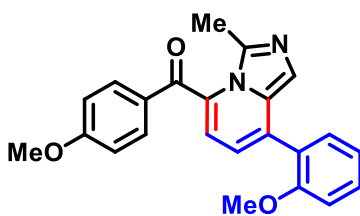

3bg,  $^{13}\text{C}\{^1\text{H}\}$  NMR  
100 MHz,  $\text{CDCl}_3$

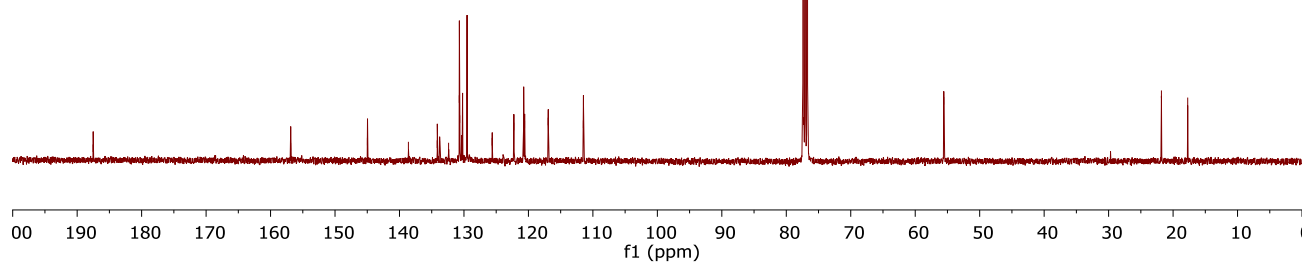

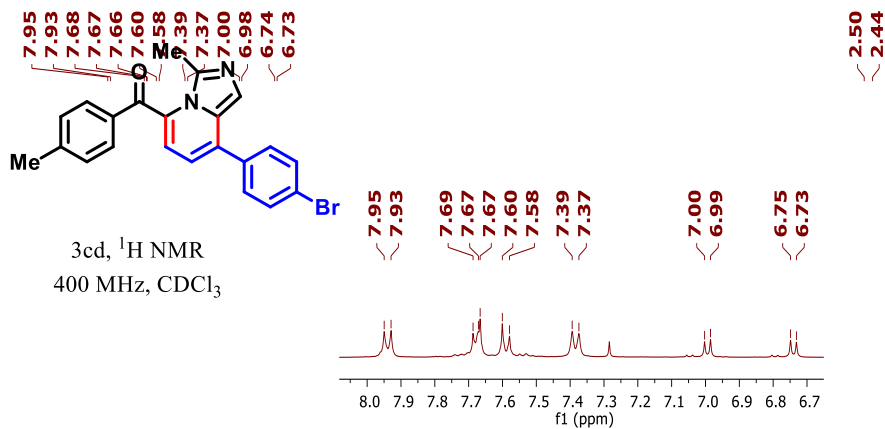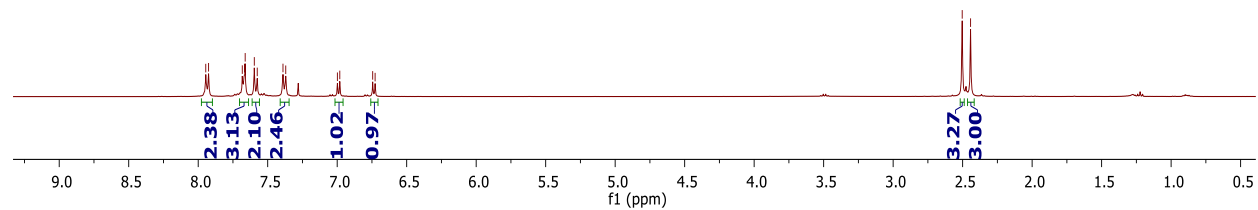

May 27-2020.4.fid  
NM-R

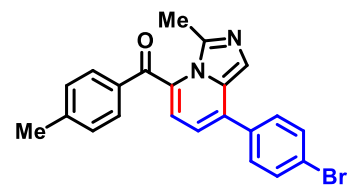

3cd,  $^{13}\text{C}\{^1\text{H}\}$  NMR  
100 MHz,  $\text{CDCl}_3$

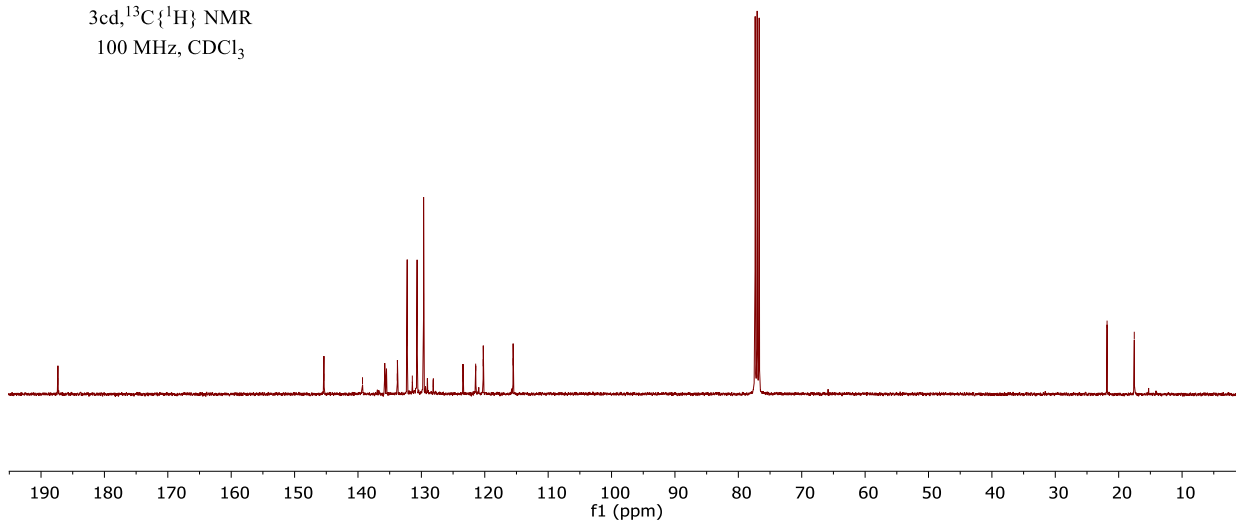

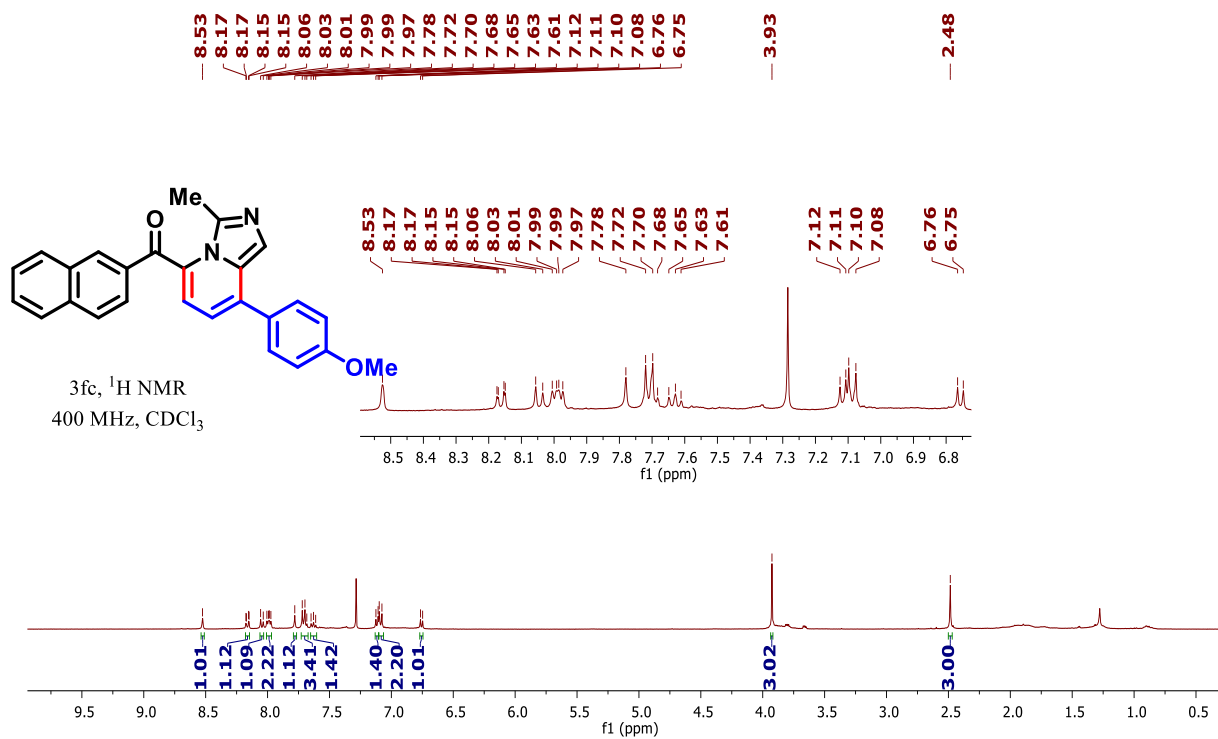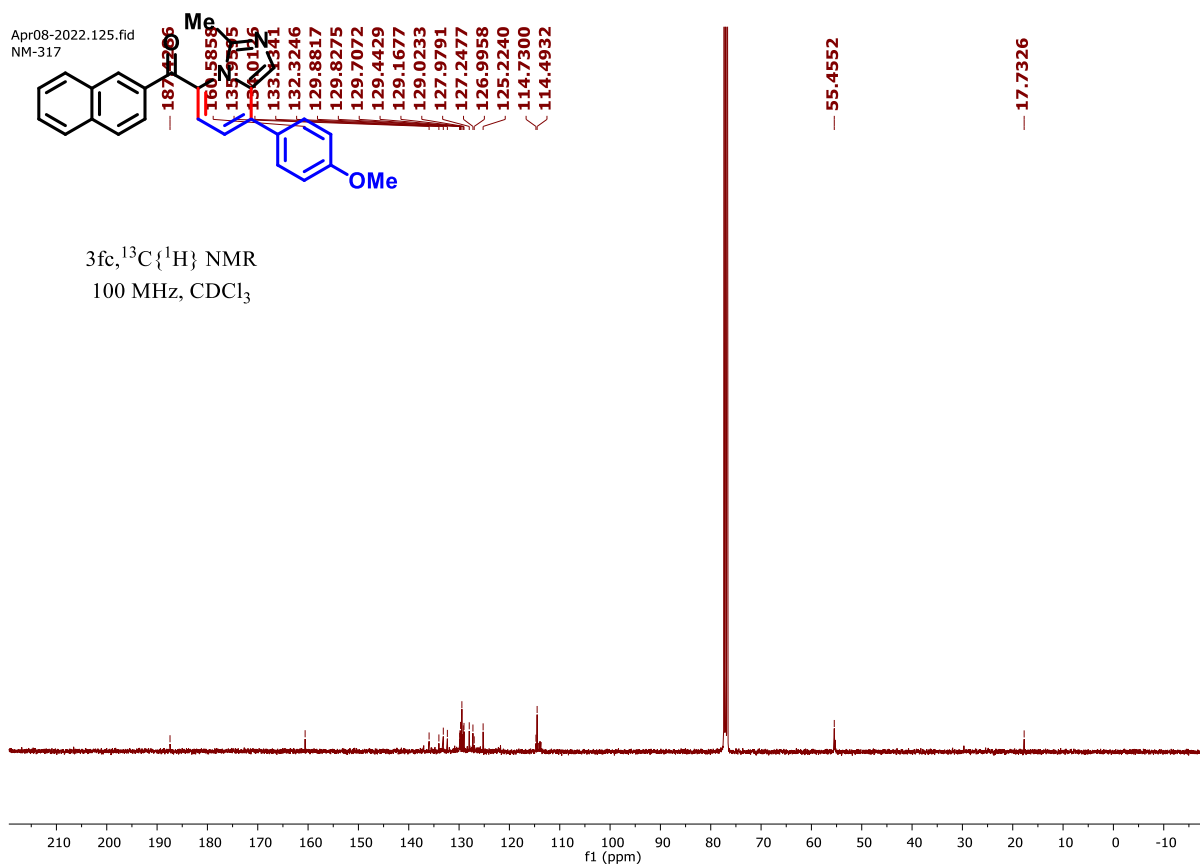



Apr08-2022 12:28  
NM-318

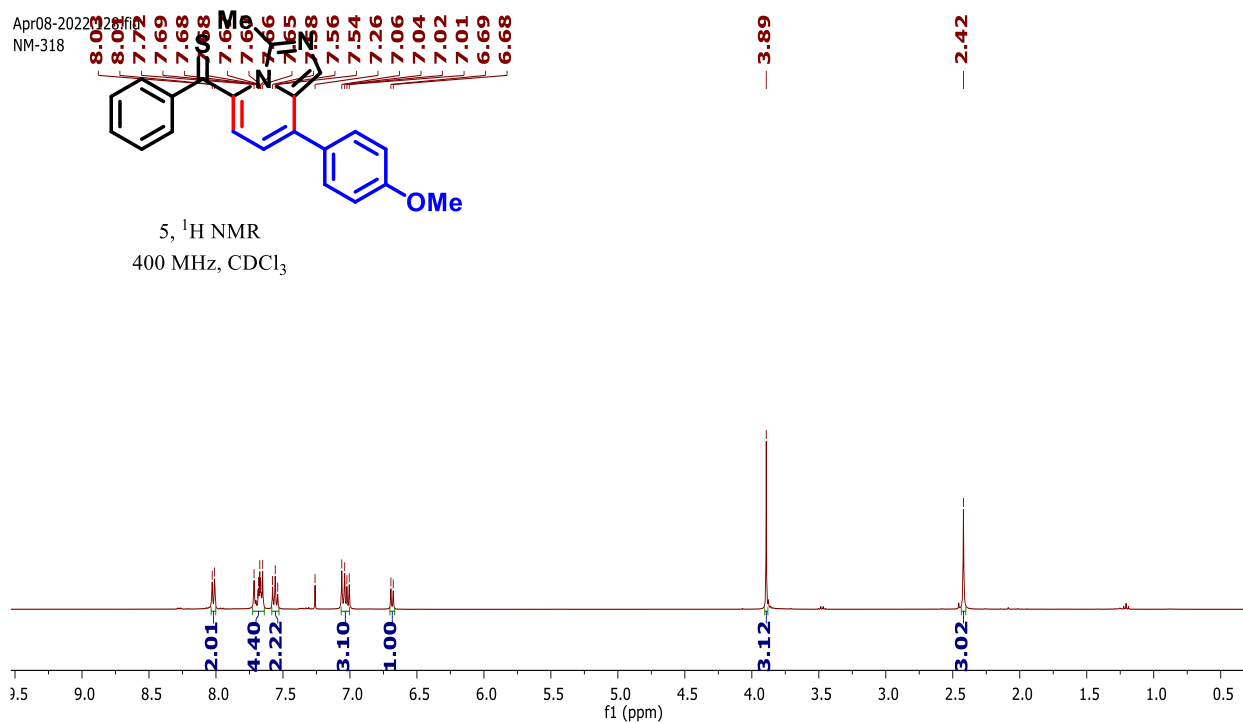

nmr2019/NM-318 C13 NMR  
NM-318

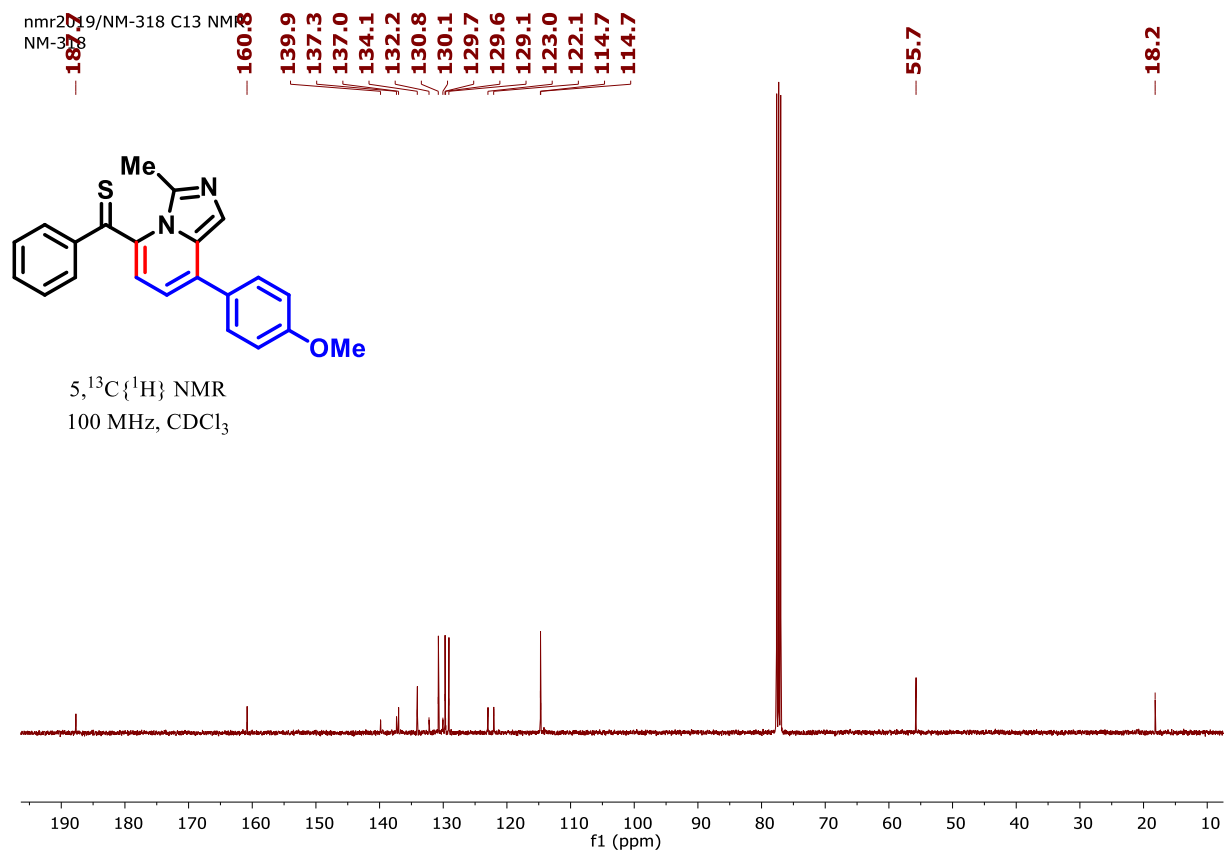

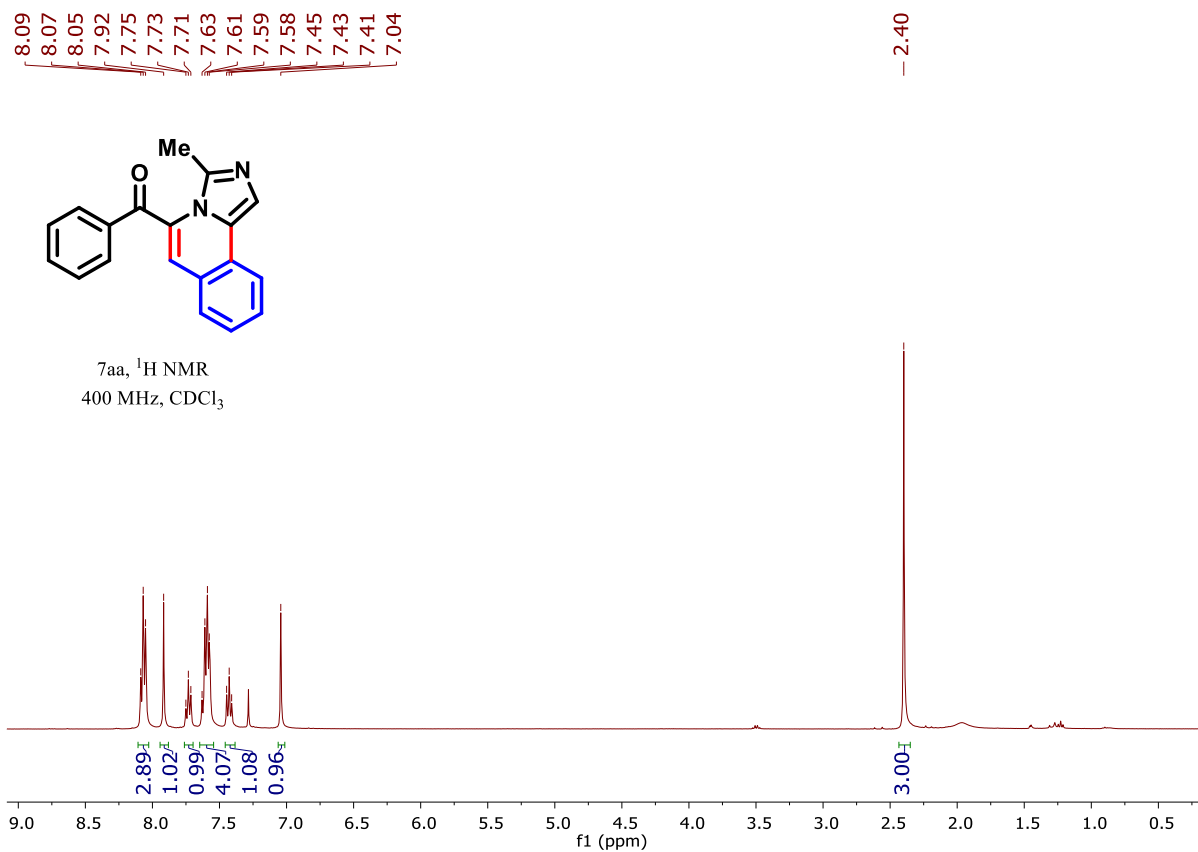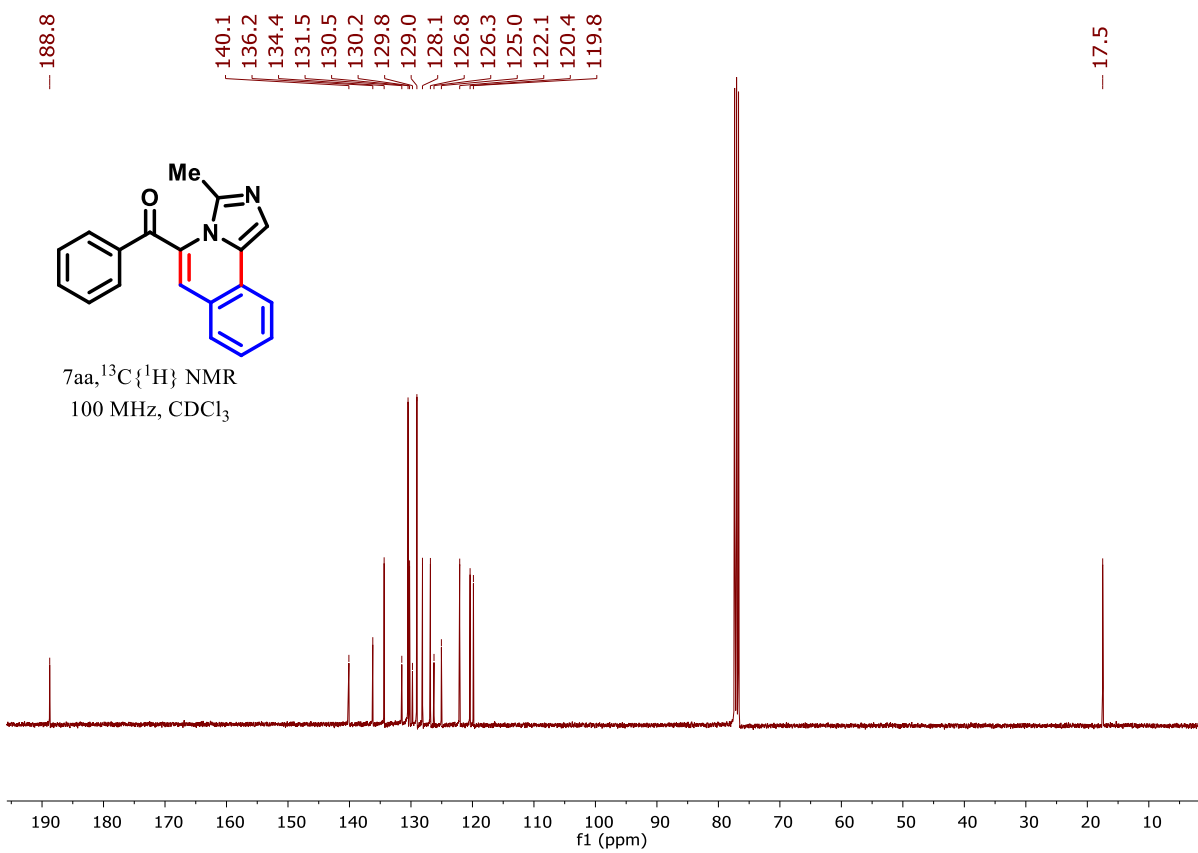

8.07  
8.05  
7.82  
7.74  
7.73  
7.71  
7.61  
7.59  
7.57  
7.44  
7.06  
7.00

4.10  
3.95

2.41

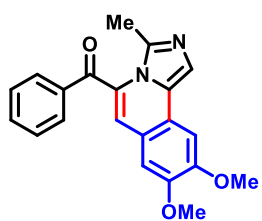

7ab,  $^1\text{H}$  NMR  
400 MHz,  $\text{CDCl}_3$

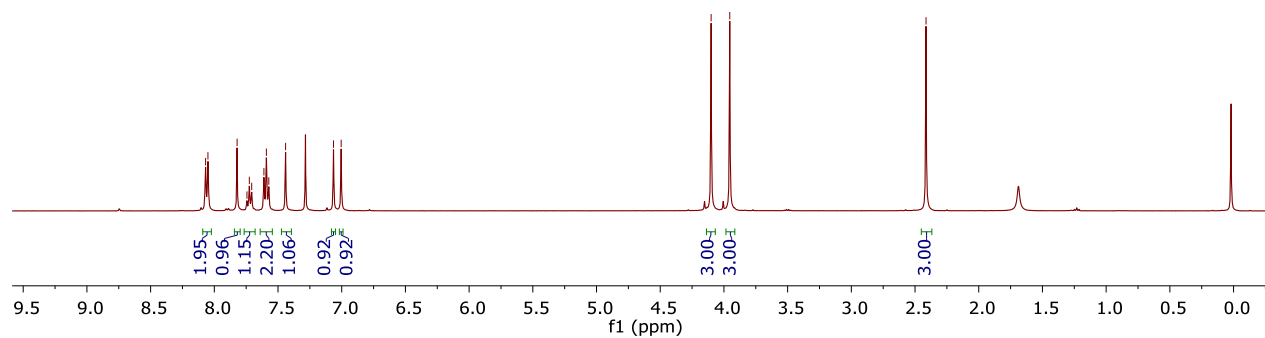

188.3  
152.0  
149.0  
139.7  
136.6  
134.0  
130.5  
130.0  
129.8  
128.9  
121.2  
120.9  
118.9  
118.8  
108.8  
103.1

56.3  
56.0

17.7

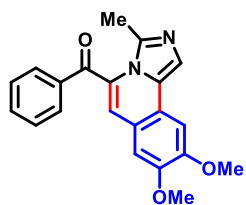

7ab,  $^{13}\text{C}\{^1\text{H}\}$  NMR  
100 MHz,  $\text{CDCl}_3$

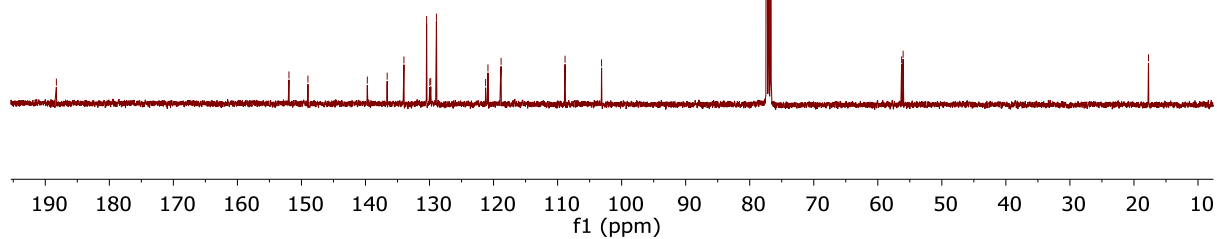

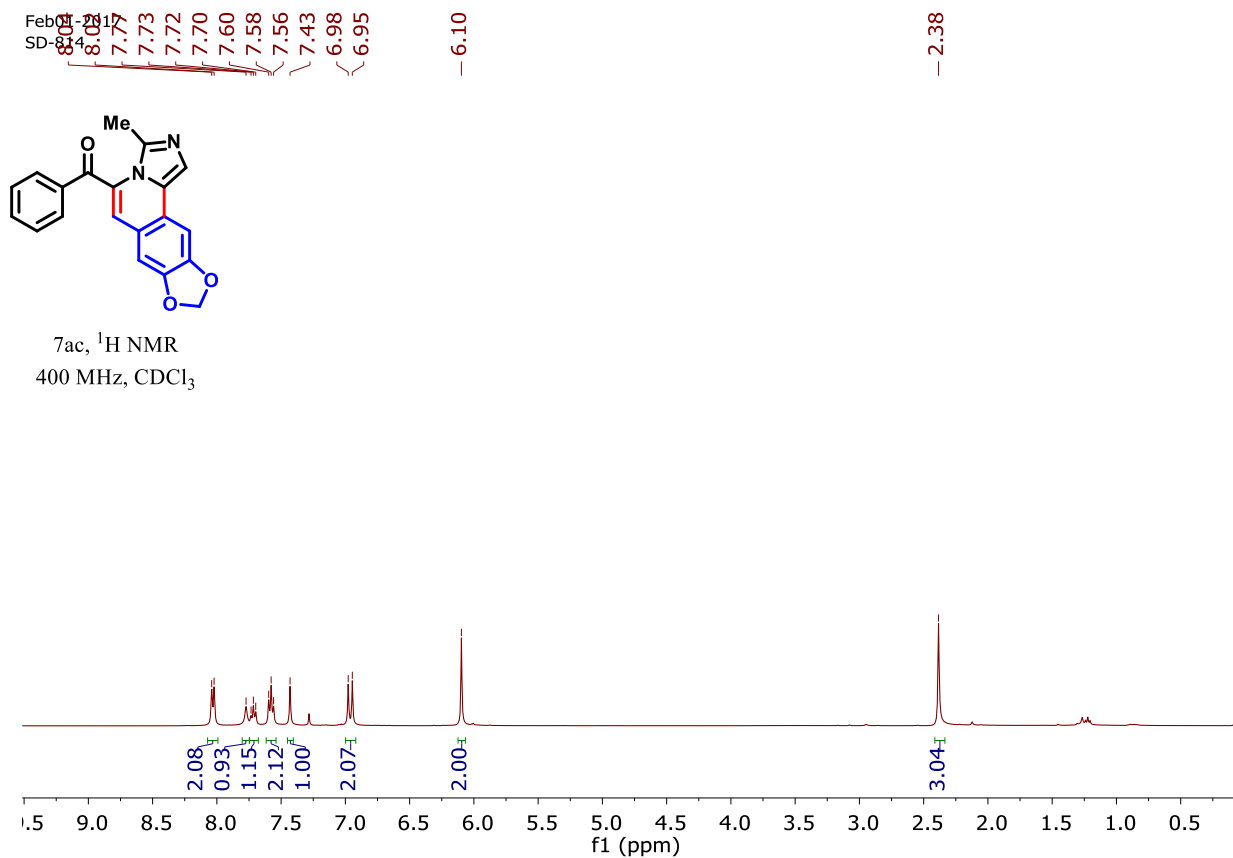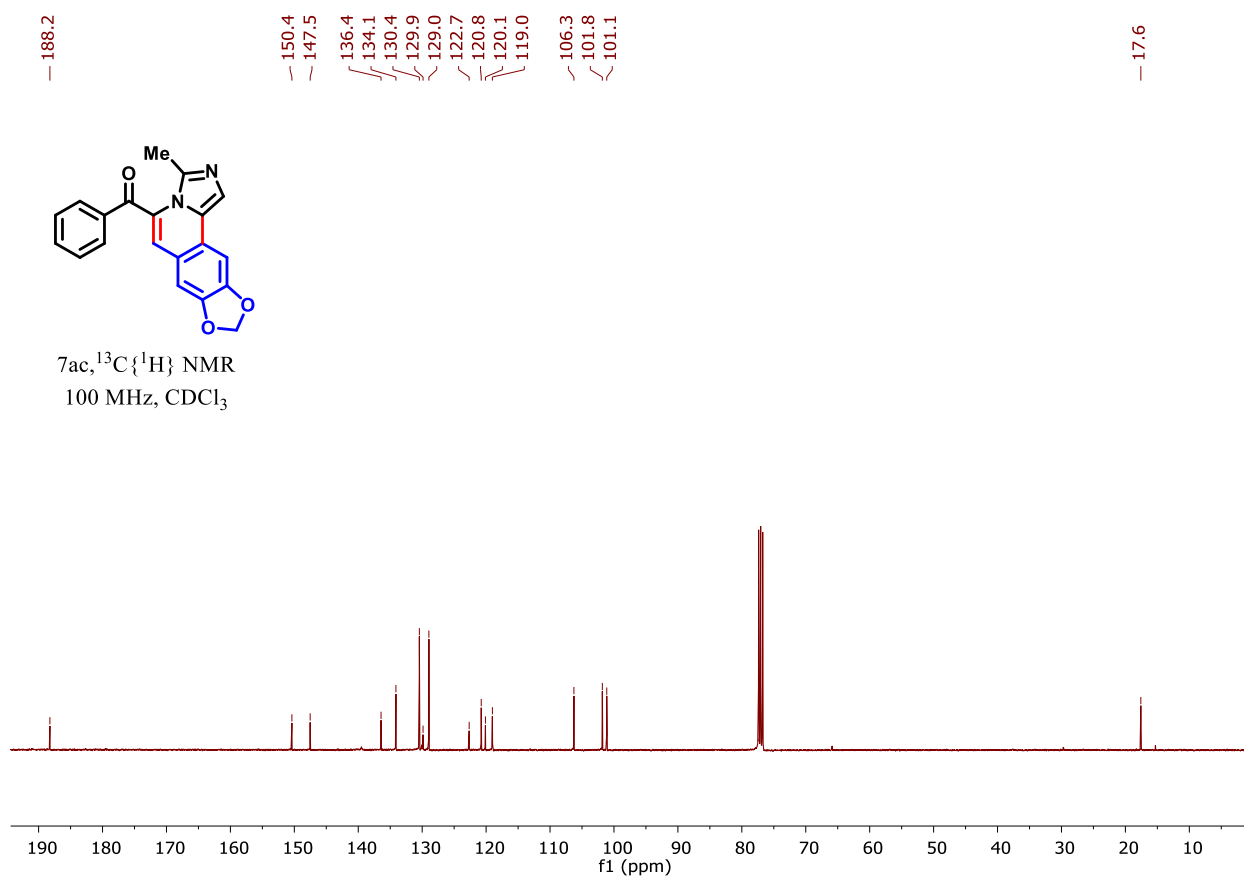

8.08  
8.06  
8.04  
7.85  
7.76  
7.74  
7.73  
7.61  
7.60  
7.58  
7.37  
7.36  
7.35  
7.34  
7.33  
7.32  
7.28  
7.28  
7.27  
7.26  
7.25  
6.95

2.38

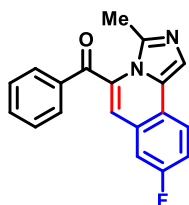

7ad,  $^1\text{H}$  NMR  
400 MHz,  $\text{CDCl}_3$

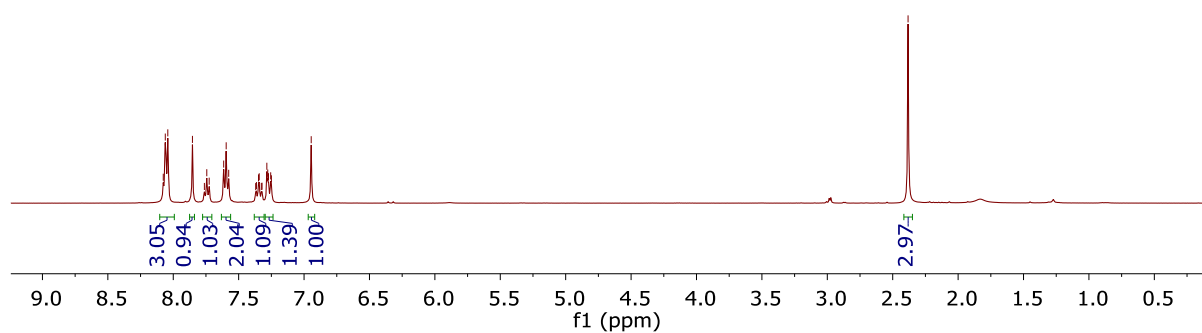

188.7  
162.4  
160.0  
139.9  
135.9  
134.6  
132.5  
130.5  
129.3  
129.1  
126.7  
126.6  
124.2  
124.1  
122.7  
122.7  
119.8  
118.5  
118.3  
118.1  
118.1  
113.3  
113.1  
17.4

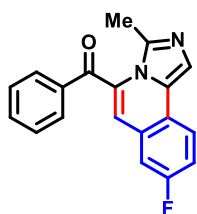

7ad,  $^{13}\text{C}\{^1\text{H}\}$  NMR  
100 MHz,  $\text{CDCl}_3$

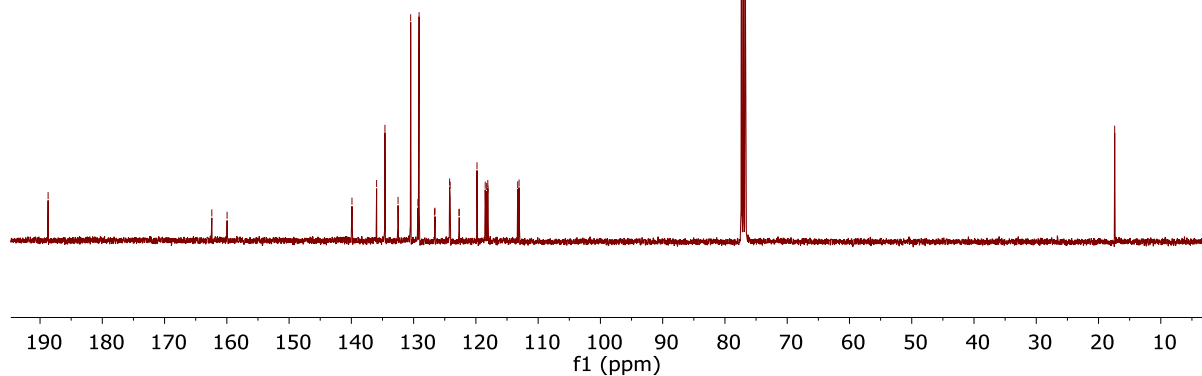

Feb03-2021.114.fid  
NM-529

8.06  
8.07  
8.08  
8.03  
7.99  
7.66  
7.64  
7.62  
7.61  
7.50  
7.48  
7.46  
7.07  
7.06  
7.06  
7.04

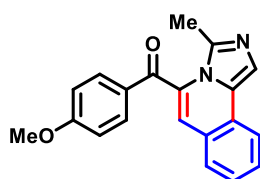

7ba,  $^1\text{H}$  NMR  
400 MHz,  $\text{CDCl}_3$

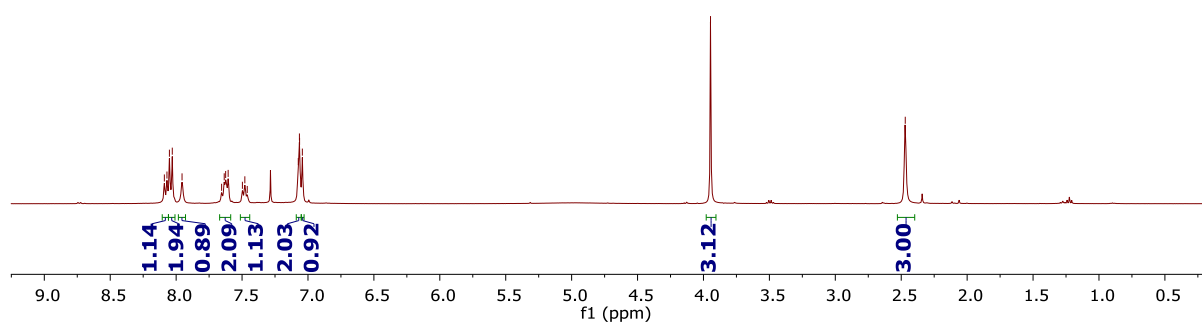

Feb03-2021.114.fid  
NM-529

187.8  
164.9  
139.6  
133.0  
131.2  
130.3  
129.8  
128.8  
128.2  
127.5  
125.6  
125.3  
122.3  
119.5  
118.1  
114.5  
55.8  
16.7

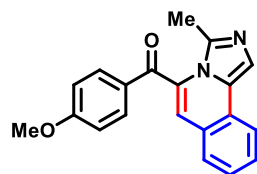

7ba,  $^{13}\text{C}\{^1\text{H}\}$  NMR  
100 MHz,  $\text{CDCl}_3$

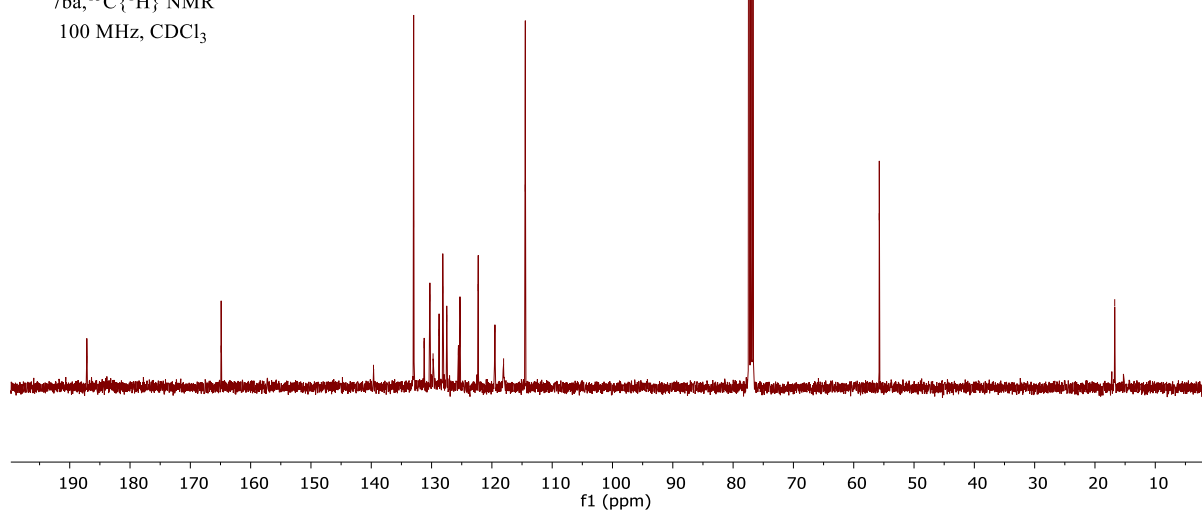

REVISION WORK  
NM-530

8.19  
8.17  
8.15  
8.13  
8.11  
8.09  
8.07  
8.05  
7.99  
7.98  
7.97  
7.74  
7.72  
7.70  
7.69  
7.67  
7.65  
7.63  
7.62  
7.51  
7.49  
7.47  
7.19

2.49

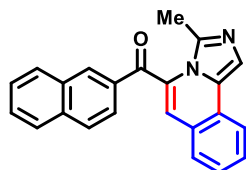

7fa,  $^1\text{H}$  NMR  
400 MHz,  $\text{CDCl}_3$

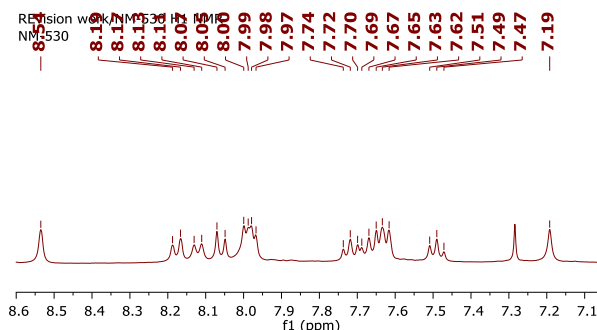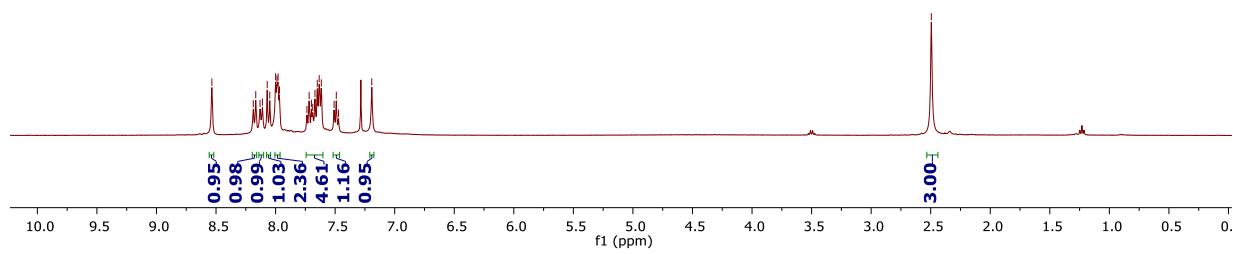

Jan22-2021.3.fid  
NM-530

187.3  
136.3  
133.6  
133.0  
132.3  
131.1  
130.9  
129.9  
129.8  
129.5  
128.7  
128.3  
128.1  
127.5  
125.3  
124.8  
122.6  
122.0

16.4

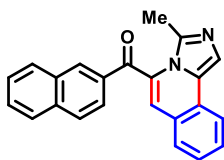

7fa,  $^{13}\text{C}\{^1\text{H}\}$  NMR  
100 MHz,  $\text{CDCl}_3$

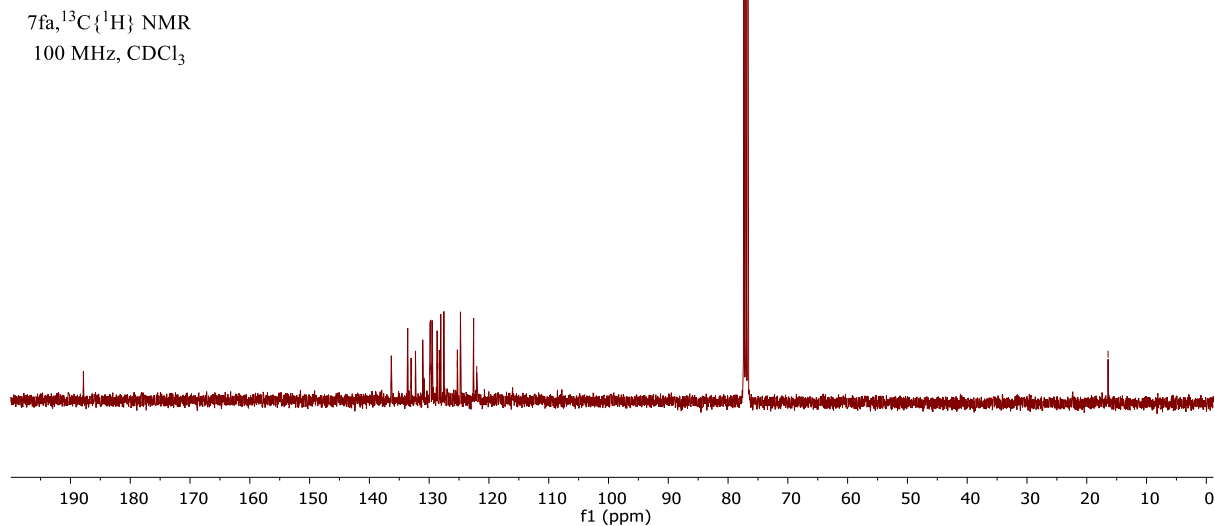

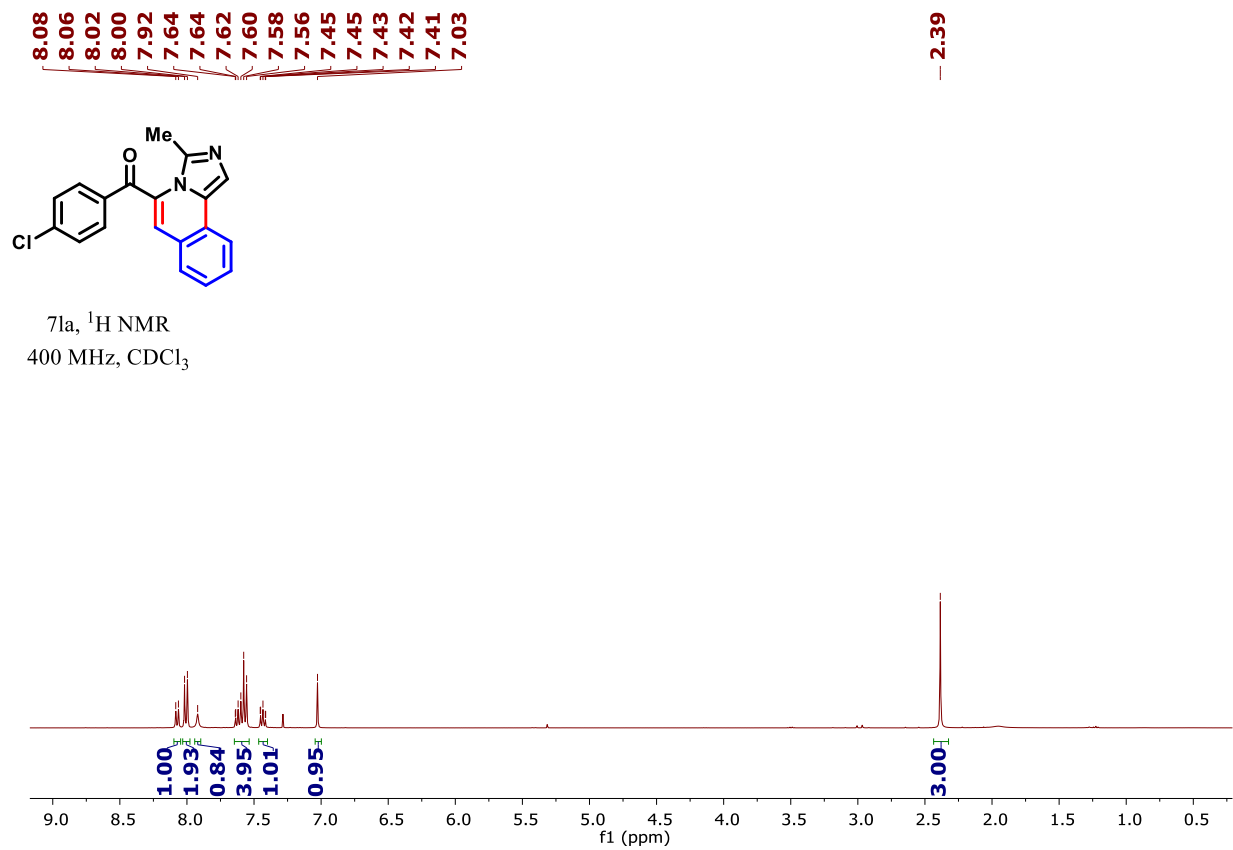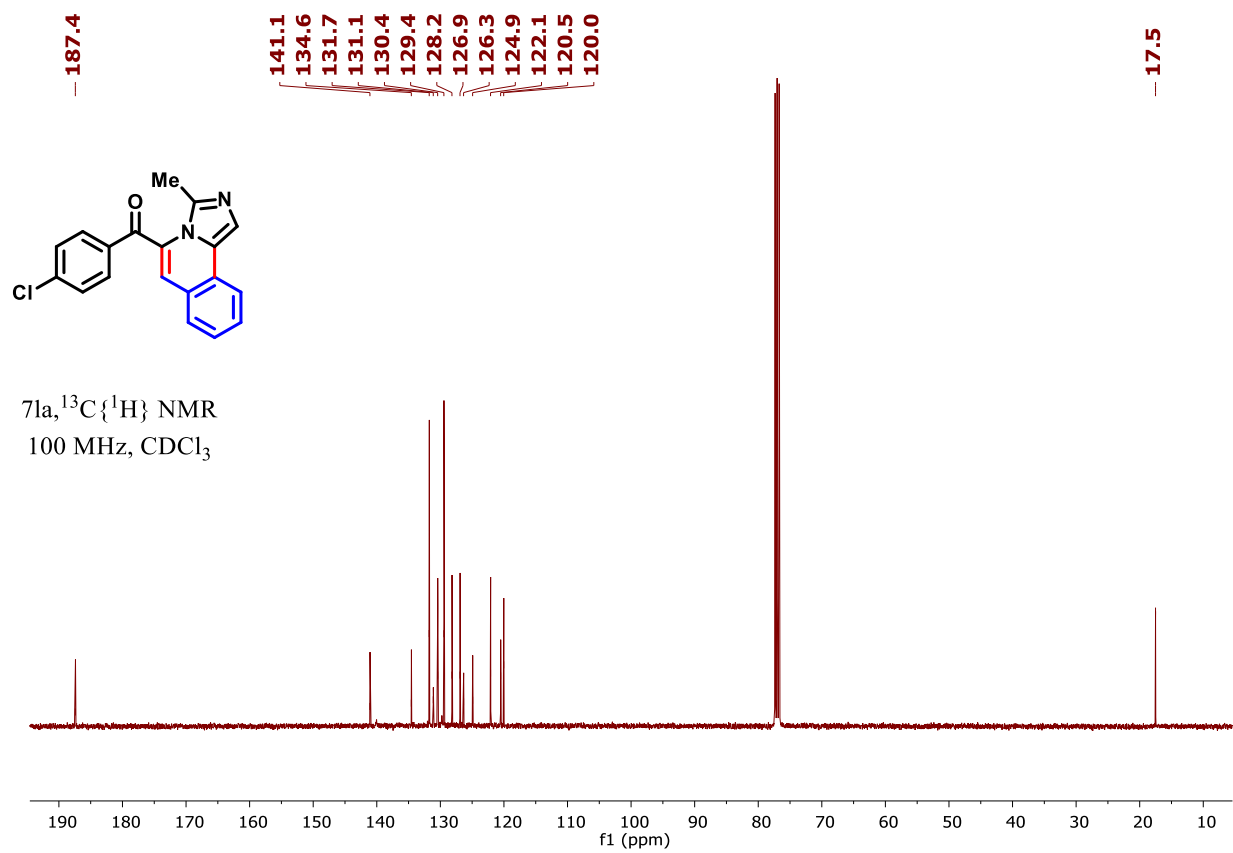



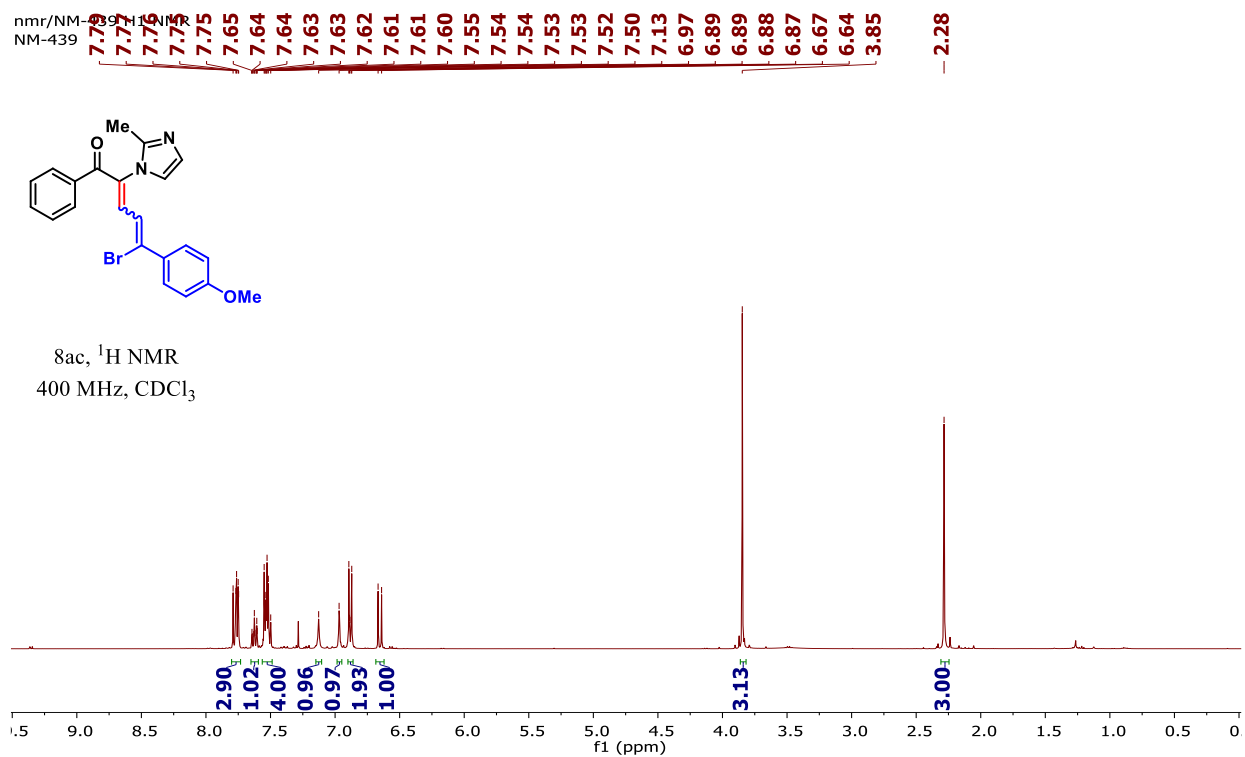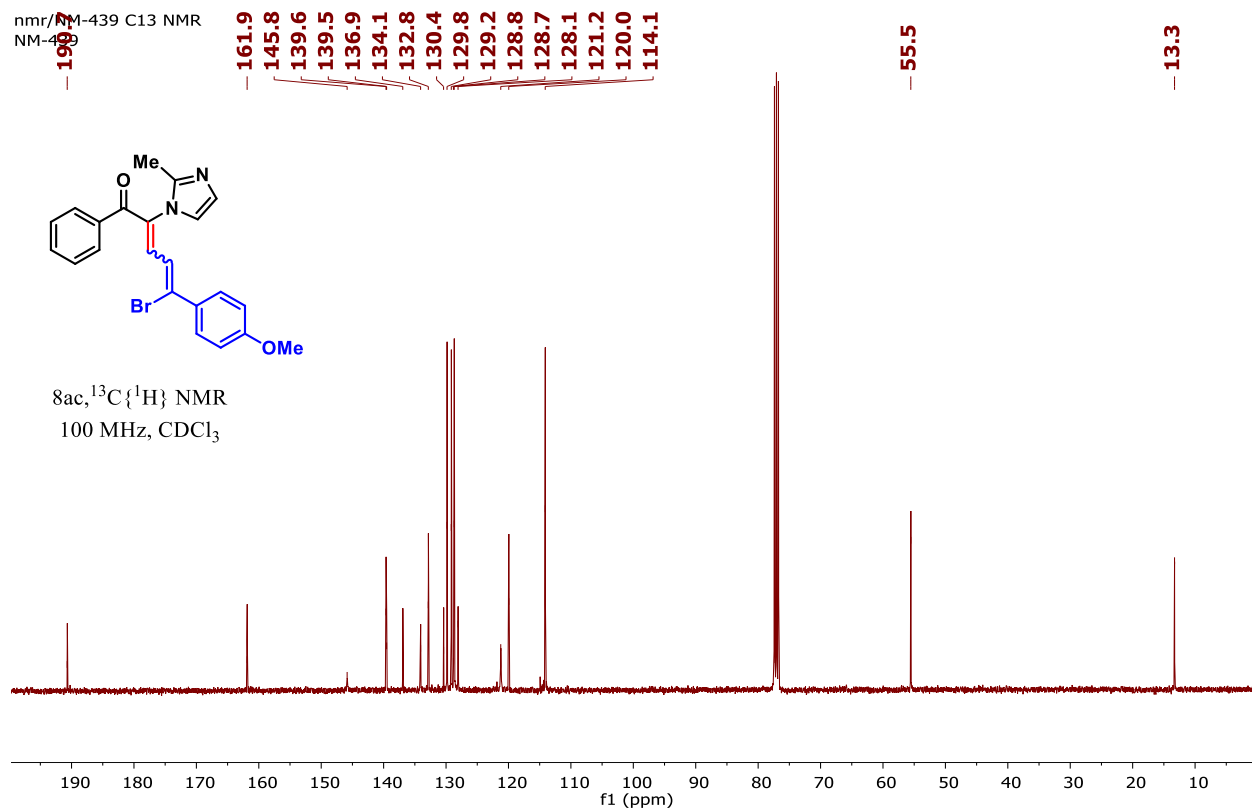

## 2. Single Crystal X-ray Crystallographic Analysis

Single crystal X-ray data of compound **3ah** (CCDC 2159571)

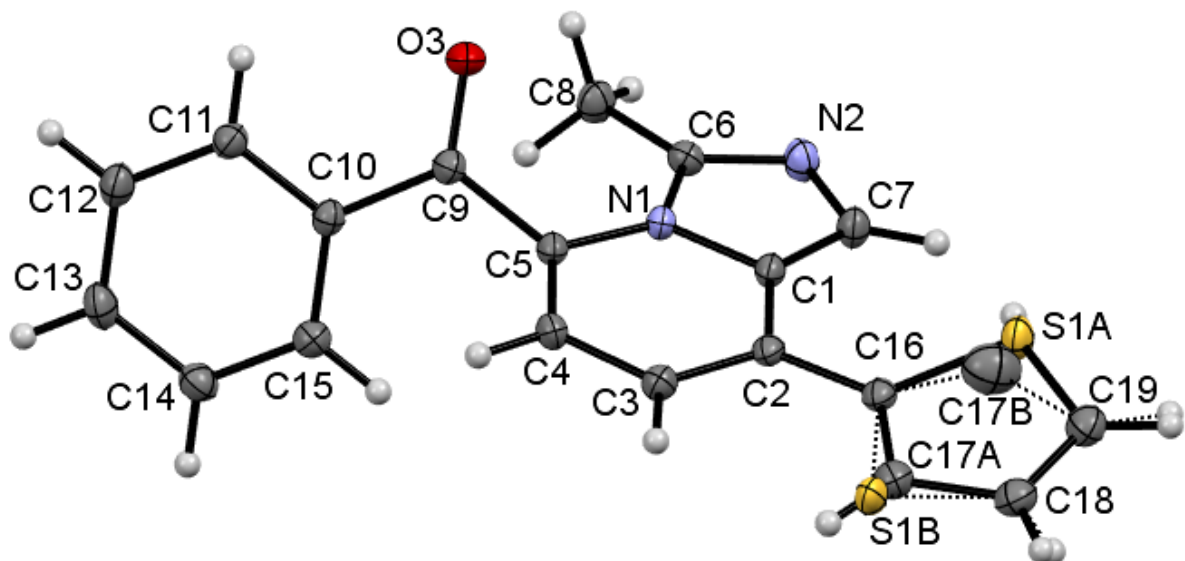

Figure S1. Single crystal ORTEP diagram of compound **3ah**, due to the rotation of the thiophen ring along C2-C16 bond the occupancies of S1A and S1B are fixed to 70 % and 30 % respectively, and similarly C17A and C17B occupancies are fixed to 70 % and 30 % respectively. The thermal ellipsoids are drawn to a 50 % probability level.

**Sample Preparation and Crystal Measurement:** The single crystals of the compound **3ah** were obtained as needles. The crystal data collection and data reduction were performed using CrysAlis PRO on a single crystal Rigaku Oxford XtaLab Pro diffractometer. The crystals were kept at 93(2) K during data collection using CuK $\alpha$  ( $\lambda = 1.54184$ ) radiation. Using Olex2,<sup>1</sup> the structure was solved with the ShelXT<sup>2</sup> structure solution program using Intrinsic Phasing and refined with the ShelXL<sup>3</sup> refinement package using Least Squares minimization.

**Table S1 Crystal data and structure refinement for 3ah (exp\_665\_AK\_NM-288).**

|                                             |                                                                |
|---------------------------------------------|----------------------------------------------------------------|
| Identification code                         | <b>3ah</b> (exp_665_AK_NM-288)                                 |
| Empirical formula                           | C <sub>19</sub> H <sub>14</sub> N <sub>2</sub> OS              |
| Formula weight                              | 318.38                                                         |
| Temperature/K                               | 93(2)                                                          |
| Crystal system                              | triclinic                                                      |
| Space group                                 | P-1                                                            |
| a/Å                                         | 7.6918(2)                                                      |
| b/Å                                         | 7.7847(2)                                                      |
| c/Å                                         | 13.7184(3)                                                     |
| $\alpha$ /°                                 | 90.026(2)                                                      |
| $\beta$ /°                                  | 97.054(2)                                                      |
| $\gamma$ /°                                 | 114.557(3)                                                     |
| Volume/Å <sup>3</sup>                       | 740.27(4)                                                      |
| Z                                           | 2                                                              |
| $\rho_{\text{calc}}$ /cm <sup>3</sup>       | 1.428                                                          |
| $\mu$ /mm <sup>-1</sup>                     | 1.982                                                          |
| F(000)                                      | 332.0                                                          |
| Crystal size/mm <sup>3</sup>                | 0.1 × 0.08 × 0.05                                              |
| Radiation                                   | Cu K $\alpha$ ( $\lambda$ = 1.54184)                           |
| 2 $\theta$ range for data collection/°      | 12.522 to 160.416                                              |
| Index ranges                                | -7 ≤ h ≤ 9, -9 ≤ k ≤ 9, -17 ≤ l ≤ 17                           |
| Reflections collected                       | 7457                                                           |
| Independent reflections                     | 3095 [ $R_{\text{int}}$ = 0.0340, $R_{\text{sigma}}$ = 0.0402] |
| Data/restraints/parameters                  | 3095/2/227                                                     |
| Goodness-of-fit on F <sup>2</sup>           | 1.113                                                          |
| Final R indexes [ $I \geq 2\sigma(I)$ ]     | $R_1$ = 0.0487, $wR_2$ = 0.1375                                |
| Final R indexes [all data]                  | $R_1$ = 0.0505, $wR_2$ = 0.1397                                |
| Largest diff. peak/hole / e Å <sup>-3</sup> | 0.26/-0.51                                                     |

### 3. References

1. O. V. Dolomanov, L. J. Bourhis, R. J. Gildea, J. A. K. Howard and H. Puschmann, *J. Appl. Cryst.*, 2009, **42**, 339-341.
2. G. Sheldrick, *Acta Cryst. A*, 2015, **71**, 3-8.
3. G. Sheldrick, *Acta Cryst. C*, 2015, **71**, 3-8.
